# Supplementary material
Source: PubMed Central journal article supplement (PMC5255953)
Supplement: ejhg2016153x1.pdf [file ejhg2016153x1.pdf]

**Supplementary Information for:**

**A Genome-Wide Investigation into Parent-of-Origin Effects in  
Autism Spectrum Disorder Identifies Previously Associated Genes  
including *SHANK3*.**

Siobhan Connolly<sup>a1</sup> Richard Anney<sup>ab</sup> Louise Gallagher<sup>a</sup> Elizabeth A. Heron<sup>a</sup>

*a* : Neuropsychiatric Genetics Research Group,  
Dept. of Psychiatry, Trinity College Dublin,  
Trinity Centre for Health Sciences, James's St.,  
Dublin 8, Ireland.

*b* : Institute of Psychological Medicine and Clinical Neurosciences,  
Cardiff University School of Medicine,  
Hadyn Ellis Building, Maindy Road, Cathays,  
Cardiff CF24 4HQ, United Kingdom.

<sup>1</sup>Corresponding author. E-mail: connolly.siobhan@gmail.com  
Tel: +353(1)8963272

# Materials and Methods

## Statistical Model

Estimation of Maternal, Imprinting and interaction effects using Multinomial Modelling (EMIM) [1] directly maximises the multinomial likelihood to detect parent-of-origin effects. EMIM has many advantages over other statistical methods (such as LRT [2], PO-LRT [3], CPG [4] and CEPG [4]) for detecting parent-of-origin effects as EMIM has consistent type I error rates, in general offers the strongest power and is flexible in study and model design [5]. The theoretical frequencies for the multinomial model are shown in Table S1, where column 5 gives the parameters that are

**Table S1: Theoretical Frequencies for Family Trios**

| No. of Variant Alleles (MPC <sup>a</sup> ) | Parental Origin (Mat and/or Pat) | Mating Type | Theoretical Frequency <sup>b</sup>      | EMIM Parameters <sup>c</sup>              |
|--------------------------------------------|----------------------------------|-------------|-----------------------------------------|-------------------------------------------|
| 222                                        | Mat & Pat                        | 1           | $S_2 R_2 I_M I_P \alpha_{22} \mu_1$     | $(S_1)^2 (R_1^*)^2 I_M^* \mu_1$           |
| 212                                        | Mat & Pat                        | 2           | $S_2 R_2 I_M I_P \mu_2$                 | $(S_1)^2 (R_1^*)^2 I_M^* \mu_2$           |
| 122                                        | Mat & Pat                        | 2           | $S_1 R_2 I_M I_P \alpha_{12} \mu_2$     | $S_1 (R_1^*)^2 I_M^* \mu_2$               |
| 211                                        | Mat                              | 2           | $S_2 R_1 I_M \alpha_{21} \mu_2$         | $(S_1)^2 R_1^* I_M^* \mu_2$               |
| 121                                        | Pat                              | 2           | $S_1 R_1 I_P \alpha_{12} \mu_2$         | $S_1 R_1^* \alpha_{11} \mu_2$             |
| 201                                        | Mat                              | 3           | $S_2 R_1 I_M \mu_3$                     | $(S_1)^2 R_1^* I_M^* \mu_3$               |
| 021                                        | Pat                              | 3           | $R_1 I_P \mu_3$                         | $R_1^* \mu_3$                             |
| 112                                        | Mat & Pat                        | 4           | $S_1 R_2 I_M I_P \alpha_{11} \mu_4$     | $S_1 (R_1^*)^2 I_M^* \alpha_{12} \mu_4$   |
| 111                                        | Mat or Pat                       | 4           | $S_1 R_1 (I_M + I_P) \alpha_{11} \mu_4$ | $S_1 R_1^* (I_M^* + 1) \alpha_{11} \mu_4$ |
| 110                                        |                                  | 4           | $S_1 \alpha_{11} \mu_4$                 | $S_1 \mu_4$                               |
| 101                                        | Mat                              | 5           | $S_1 R_1 I_M \mu_5$                     | $S_1 R_1^* I_M^* \alpha_{11} \mu_5$       |
| 011                                        | Pat                              | 5           | $R_1 I_P \mu_5$                         | $R_1^* \mu_5$                             |
| 100                                        |                                  | 5           | $S_1 \mu_5$                             | $S_1 \mu_5$                               |
| 010                                        |                                  | 5           | $\mu_5$                                 | $\mu_5$                                   |
| 000                                        |                                  | 6           | $\mu_6$                                 | $\mu_6$                                   |

<sup>a</sup>M,P and C are the number of copies of the allele the mother, father and offspring possess, respectively.

<sup>b</sup> $R_k$ ,  $S_j$  and  $\alpha_{jk}$ , for  $j, k \in \{1, 2\}$ , denote the relative risk associated with  $j = M$  and  $k = C$  copies.  $I_M$  and  $I_P$  denote the relative risk associated with the allele originating from the mother and the father respectively, compared to the risk associated with the allele not being inherited.  $\mu_i$  for  $i \in \{1, \dots, 6\}$  are the relative frequencies for the 6 different parental-mating types shown in Column 3.

<sup>c</sup>These are the parameters that can be estimated in EMIM as defined here with  $R_1^* = R_1 I_P$ ,  $R_2^* = R_2 (I_P)^2$ ,  $I_M^* = I_M / I_P$  and assuming a multiplicative model leads to  $(S_1)^2 = S_2$  and  $(R_1)^2 = R_2 \implies (R_1^*)^2 = (R_2^*)^2$ .

estimated in the model for this analysis. Mother/offspring interactions were not included in the model due to power issues, although we did investigate these interactions when an offspring genetic effect and maternal genetic effect were identified. In this scenario, the model is run again in EMIM at only this SNP but this time including interactions in the model and utilising the Likelihood Ratio Test (LRT) to compare the model with interactions to the model without interactions. The model in EMIM assumes a genetic multiplicative model, shown in column 5, Table S1. Assuming a multiplicative model can help increase power under certain genetic models (such as a true dominant model) and is robust even when the model is misspecified [6]. One exception is when the true model is a recessive model, however there is little power to detect a recessive variant even when correctly specified [6]. Note: we assume parental mating symmetry (shown in column 3, Table S1) in the population (when the proportion of matings with mothers of genotype  $M = m$  and fathers of genotype  $P = p$  is the same as the proportion of matings with mothers of genotype  $M = p$  and fathers of genotype  $P = m$  for the population) in order to investigate maternal genetic effects.

## Quality Control Procedures

Quality Control (QC) procedures involve two main steps, QC of individuals and QC of SNPs. We conducted the QC procedures using PLINK [7] and R [8]. We carried out our QC procedures on the Strict Autism phenotype separate to the Spectrum Autism phenotype. This was necessary in order to ensure that only the individuals included in the dataset would have an influence on the SNPs that passed our QC criteria.

We carried out Principal Component Analyses (PCA) (Eigenstrat, [9]) for both the AGP and SSC data to examine the structure of the populations using only high quality independent SNPs from one affected offspring per family with HapMap data [10] as a reference. From Figure S1, it is evident that the majority of samples from both the AGP and SSC are of European descent. We did

not remove individuals that were not of European descent as we did not assume Hardy-Weinberg equilibrium (HWE) in our model in EMIM, but we did assume parental symmetry and we stratified the data into six mating types in order to make the model robust against population stratification.

For our analyses, we only considered independent trios consisting of one affected offspring

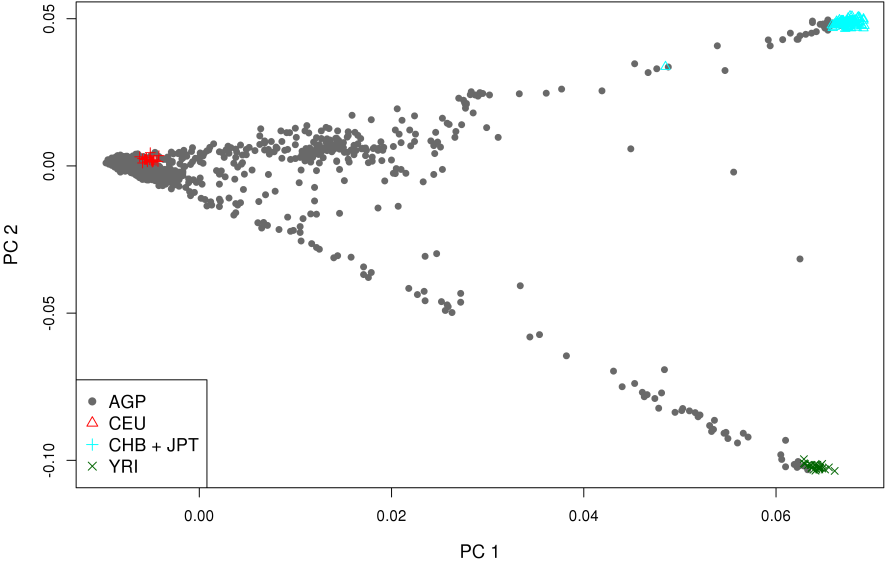

(a) AGP

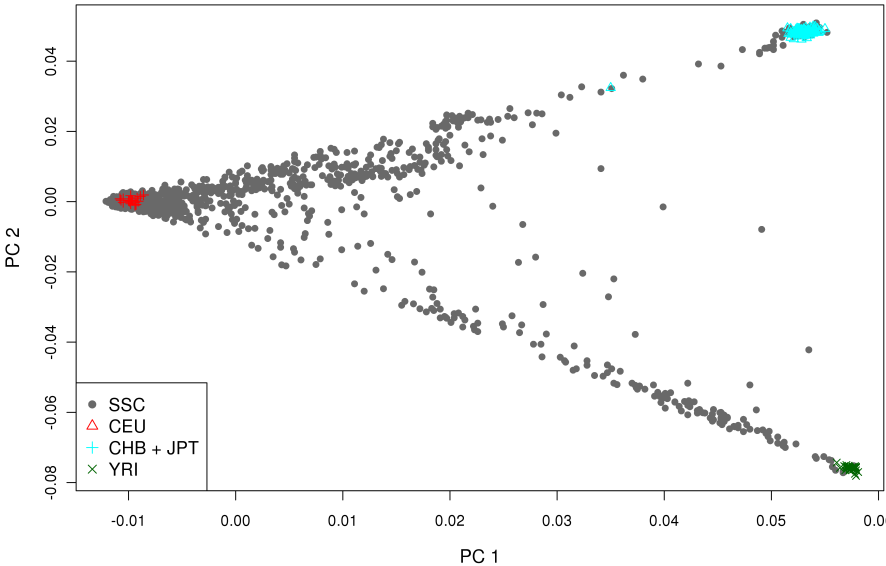

(b) SSC

**Figure S1: Principal Component Analysis** for the AGP and SSC data including the Hapmap data (release 23) for reference.

and two genotyped parents. Only considering trios reduces the amount of missing genotype data that needs to be estimated in EMIM, thus potentially increasing power. In the families with more than one affected sibling, we randomly selected a sibling to include and removed all other(s). Filtering of high call rates (>95%) for both the SNPs and the individuals was then carried out. We QC'd the data for any serious deviations from HWE (p-value < 0.00001) because even though we did not assume HWE in our model (we assumed parental symmetry), HWE can also detect genotyping error and non-random mating such as inbreeding. We removed SNPs with MAF < 5%. We investigated individuals and SNPs for Mendelian errors and any errors that were below 0.05% (minor errors) were set to missing. We also removed any extreme deviations of heterozygosity and checked for relatedness between families. We also removed any other SNPs that had a HWE p-value < 0.00001 again in order to make the model more robust to population stratification. At each QC step we removed any families that did not consist of complete trios. See Table S2 and Table S3 for further details on the QC.

**Table S2: Quality Control Procedure for AGP datasets**

|                                  | Strict AGP Data |         | Spectrum AGP Data |         |
|----------------------------------|-----------------|---------|-------------------|---------|
|                                  | Families        | SNPs    | Families          | SNPs    |
| <b>Start:</b>                    | 2 931           | 924 324 | 2 931             | 924 324 |
| Autosomal SNPs                   | 2 931           | 908 421 | 2 931             | 908 421 |
| 1 affected offspring & 2 parents | 1 723           | 908 421 | 2 782             | 908 421 |
| <b>QC Steps:</b>                 |                 |         |                   |         |
| Call Rate < 95%                  | 62              | 70 741  | 90                | 70 554  |
| HWE < 0.00001                    | -               | 20 744  | -                 | 31 811  |
| MAF < 5%                         | -               | 81 974  | -                 | 77 796  |
| Mendelian Errors > 0.5%          | 0               | 0       | 0                 | 0       |
| Heterozygosity                   | 62              | -       | 88                | -       |
| Relatedness                      | 5               | -       | 10                | -       |
| HWE < 0.00001                    | -               | 37      | -                 | 32      |
| <b>Final</b>                     | 1 594           | 734 925 | 2 594             | 728 228 |

**Table S3: Quality Control Procedure for SSC datasets**

|                                  | Strict SSC Data |         | Spectrum SSC Data |         |
|----------------------------------|-----------------|---------|-------------------|---------|
|                                  | Families        | SNPs    | Families          | SNPs    |
| <b>Start:</b>                    | 2 591           | 645 885 | 2 591             | 645 885 |
| Autosomal SNPs                   | 2 591           | 626 243 | 2 591             | 626 243 |
| 1 affected offspring & 2 parents | 2 089           | 626 243 | 2 586             | 626 243 |
| <b>QC Steps:</b>                 |                 |         |                   |         |
| Call Rate < 95%                  | 0               | 3 843   | 0                 | 3 877   |
| HWE < 0.00001                    | -               | 55 821  | -                 | 62 430  |
| MAF < 5%                         | -               | 76 513  | -                 | 74 286  |
| Mendelian Errors > 0.5%          | 1               | 2 769   | 1                 | 2 596   |
| Heterozygosity                   | 68              | -       | 108               | -       |
| Relatedness                      | 60              | -       | 44                | -       |
| HWE < 0.00001                    | -               | 91      | -                 | 64      |
| <b>Final</b>                     | 1 960           | 487 216 | 2 433             | 483 080 |

## Bayesian Noteworthy Threshold

In specifying the parameters for the Bayesian thresholds for  $R_1$  and  $S_1$ , we note that the effect sizes in GWAS for a complex disorder are generally expected to be low. For example, the genotype relative risk for a SNP is suggested to be between 1.1 and 2 [11,12]. The most significant findings in previous GWASs in ASD include a SNP (rs4307059) on chromosome 5 with an odds ratio of 1.19 [13], another SNP (rs10513025) on chromosome 5 with an odds ratio of 0.55 ( $1/0.55 = 1.81$ ) [14] and a SNP (rs4141463) in the gene *MACROD2* on chromosome 20 with an odds ratio of 0.56 ( $1/0.56 = 1.79$ ) [15]. These previous findings all report effect sizes in terms of odds ratios. In comparing odds ratios and relative risks, these effect sizes will be similar when the event of interest is rare, otherwise the odds ratio will overestimate the relative risk. Based on the suggested range of relative risk sizes and odds ratio findings, we chose the prior on the effect size for an association and a maternal genetic effect such that there is a 5% chance that the relative risk will be larger than 2. This results in the prior variance for the log of the relative risk being  $W = 0.42^2$  [16].

There is evidence to suggest that there are several hundred to thousands of loci that are likely

to contribute to the complex genetic heterogeneity of ASD [17–19], the majority of which are due to common variation [20]. If we conservatively assume that there are 1 million independent common variants and that 500 of these variants contribute to ASD, then our prior probability that  $H_0$  is true,  $\pi_0 = 1 - 500/1,000,000 = 0.9995$ , leads to a prior odds of  $H_0$  being true of  $PO = 1,999$ . We chose  $R = 10$ , the ratio of cost of type II to type I error. We believe type II errors are 10 times as bad as type I errors, as false negative findings cannot be followed up as noted and discussed by Wakefield [21].

The standard errors in the full model produced by EMIM can be inflated [1] and when the standard error ( $V_n$ ) increases,  $Z^2$  score increases. Instead of using the standard error of  $R_1$  (offspring genetic effect) and  $S_1$  (maternal genetic effect) for  $V_n$  that the full model produces, we used the standard errors from testing for  $R_1$  and  $S_1$  independently (e.g.  $H_0: R_1 = 0$  and  $H_1: R_1 \neq 0$ ). Therefore, the standard error for  $R_1$  and  $S_1$  is calculated using  $[n \times \text{MAF} \times (1 - \text{MAF})]^{-\frac{1}{2}}$ , where  $n$  is the sample size and the MAF is the minor allele frequency calculated using the offsprings' genotypes when calculating the standard error for  $R_1$  and using the mothers' genotypes when calculating the standard error for  $S_1$ .

We calculated a  $Z^2$  score threshold for the Wald  $Z$  score for  $R_1$  (the association parameter) and then on finding results above this threshold, we investigated further for an imprinting effect using the Wald p-value for  $I_M$  (the imprinting parameter). We identified a noteworthy imprinting result when the imprinting Wald p-value is greater than the association threshold also. This process is illustrated in Figure S2, using dummy data. We calculated a  $Z^2$  score threshold for the Wald  $Z$  score for  $S_1$  (maternal genetic effect) and a noteworthy maternal genetic effect is identified when  $S_1$  is above this threshold. It is not necessary to have also identified an association at this locus. Figure S3 illustrates how we identified noteworthy maternal genetic effects.

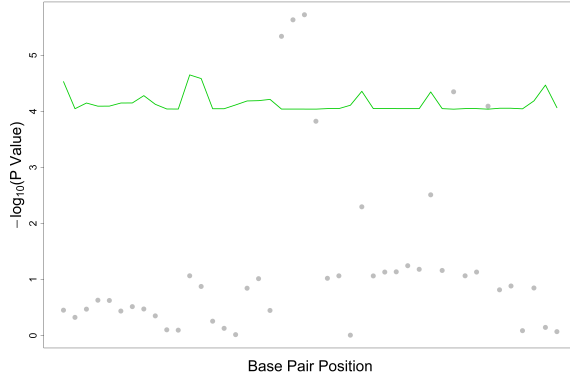

| SNP  | $R_1$ Threshold       | P-value $R_1$                           | P-value $I_M$         |
|------|-----------------------|-----------------------------------------|-----------------------|
| rs48 | $1.22 \times 10^{-4}$ | <b><math>1.10 \times 10^{-6}</math></b> | $8.33 \times 10^{-3}$ |
| rs46 | $1.18 \times 10^{-4}$ | <b><math>1.85 \times 10^{-6}</math></b> | $8.78 \times 10^{-3}$ |
| rs43 | $1.09 \times 10^{-4}$ | <b><math>3.48 \times 10^{-6}</math></b> | $9.22 \times 10^{-3}$ |
| rs88 | $1.03 \times 10^{-4}$ | <b><math>7.48 \times 10^{-5}</math></b> | $1.31 \times 10^{-5}$ |
| rs99 | $1.12 \times 10^{-4}$ | <b><math>9.81 \times 10^{-5}</math></b> | $7.18 \times 10^{-5}$ |
| rs54 | $9.92 \times 10^{-5}$ | $2.89 \times 10^{-4}$                   | $9.71 \times 10^{-2}$ |
| rs75 | $9.93 \times 10^{-5}$ | $7.02 \times 10^{-3}$                   | $4.77 \times 10^{-2}$ |
| .    | .                     | .                                       | .                     |
| .    | .                     | .                                       | .                     |
| .    | .                     | .                                       | .                     |

**Step 1: Identifying Noteworthy Associations ( $R_1$ ).** SNPs (grey) above the association threshold (green line) are considered noteworthy, there are 5 noteworthy associations here.

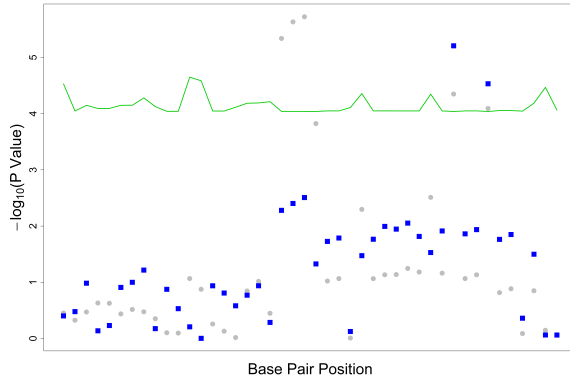

| SNP  | $R_1$ Threshold       | P-value $R_1$         | P-value $I_M$                           |
|------|-----------------------|-----------------------|-----------------------------------------|
| rs88 | $1.03 \times 10^{-4}$ | $7.48 \times 10^{-5}$ | <b><math>1.31 \times 10^{-5}</math></b> |
| rs99 | $1.12 \times 10^{-4}$ | $9.81 \times 10^{-5}$ | <b><math>7.18 \times 10^{-5}</math></b> |
| rs48 | $1.22 \times 10^{-4}$ | $1.10 \times 10^{-6}$ | $8.33 \times 10^{-3}$                   |
| rs46 | $1.18 \times 10^{-4}$ | $1.85 \times 10^{-6}$ | $8.78 \times 10^{-3}$                   |
| rs43 | $1.09 \times 10^{-4}$ | $3.48 \times 10^{-6}$ | $9.22 \times 10^{-3}$                   |
| rs70 | $9.69 \times 10^{-5}$ | $8.85 \times 10^{-2}$ | $1.98 \times 10^{-2}$                   |
| rs74 | $1.02 \times 10^{-4}$ | $9.49 \times 10^{-2}$ | $1.21 \times 10^{-2}$                   |
| .    | .                     | .                     | .                                       |
| .    | .                     | .                     | .                                       |
| .    | .                     | .                     | .                                       |

**Step 2: For Noteworthy SNPs Investigate Imprinting Effects ( $I_M$ ).** Each SNP has an association  $-\log_{10}(\text{P-value})$  (grey) and an imprinting  $-\log_{10}(\text{P-value})$  (blue). Noteworthy imprinting SNPs are those SNPs (blue) with both an imprinting  $-\log_{10}(\text{P-value})$  and an association  $-\log_{10}(\text{P-value})$  above the threshold (green line).

**Figure S2: Identifying Noteworthy Imprinting Effects using the Bayesian Threshold**

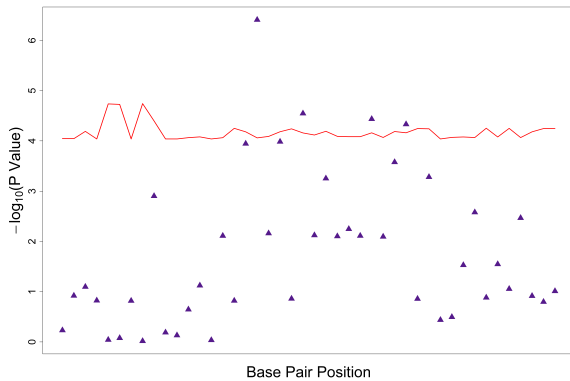

| SNP   | $S_1$ Threshold       | P-value $S_1$                           |
|-------|-----------------------|-----------------------------------------|
| rs202 | $1.12 \times 10^{-4}$ | <b><math>8.79 \times 10^{-7}</math></b> |
| rs808 | $9.89 \times 10^{-5}$ | <b><math>6.56 \times 10^{-5}</math></b> |
| rs303 | $9.23 \times 10^{-5}$ | <b><math>7.55 \times 10^{-5}</math></b> |
| rs707 | $8.62 \times 10^{-5}$ | <b><math>8.07 \times 10^{-5}</math></b> |
| rs606 | $1.01 \times 10^{-4}$ | $2.34 \times 10^{-4}$                   |
| rs404 | $1.11 \times 10^{-4}$ | $2.92 \times 10^{-4}$                   |
| rs909 | $9.91 \times 10^{-5}$ | $4.15 \times 10^{-3}$                   |
| .     | .                     | .                                       |
| .     | .                     | .                                       |
| .     | .                     | .                                       |

**Figure S3: Identifying Maternal Genetic Effects Using the Bayesian Threshold.**

SNPs (purple) above the maternal genetic threshold (red line) are considered noteworthy, there are 4 noteworthy maternal genetic effects ( $S_1$ ) here.



## Sensitivity of Bayesian Threshold

The standard error ( $V_n$ ) is controlled/determined by the sample size and MAF for the offspring genetic effect parameter,  $R_1$ , and the maternal genetic parameter,  $S_1$ . The sample size does not vary to any great extent from SNP to SNP (only changes if all 3 family members have missing data at a SNP, otherwise missing data is estimated by EMIM) but the MAF does vary and we examined what happens to the threshold as the MAF varies in Figure S4(a) using the sample size from our smallest dataset (AGP Strict,  $n = 1,594$ ). There is a higher threshold at low MAFs, which is to be expected as there is less information here to determine a noteworthy finding and thus the threshold needs to be more stringent, and once the  $MAF > 0.2$  there is not much change in the threshold, and can be seen to level out.

Given that there are several hundred to a thousand loci that are likely to contribute to ASD [17–19], we tested  $\pi_0 = 1 - 200/1\,000\,000 = 0.9998 \Rightarrow PO = 4\,999$ ,  $\pi_0 = 1 - 500/1\,000\,000 = 0.9995 \Rightarrow PO = 1\,999$  and  $\pi_0 = 1 - 1\,000/1\,000\,000 = 0.999 \Rightarrow PO = 999$  corresponding to roughly 200, 500 and 1,000 contributing loci, respectively, see Figure S4(c). We can see from this plot that the threshold is more sensitive to changes in  $PO$  than to changes in  $W$  and as would be expected, the stronger the belief that there are more associations to find the lower the Bayesian threshold.

We investigated the sensitivity to different  $R$  parameter values (ratio of cost of type II errors to type I errors) of our model, see Figure S4(d). This plot shows that the threshold is much higher for  $R = 1$  (where cost of type I errors is equal to the cost of type II errors), as would be expected. Given the limited power to detect parent-of-origin effects and that EMIM is somewhat conservative at low MAFs [5], we felt that  $R = 1$  is not appropriate for our model. Also, Wakefield [21] compared the Bayesian threshold versus the Bonferroni correction. For sample sizes ranging between 1,000 -

3,000 (which compared roughly to the sample sizes in our datasets) and using  $W = 0.42^2$  together with  $\pi_0 = 1 - 1/100,000$ , which is weaker than our belief of  $1 - 500/1\,000\,000$ , found that for  $R = 10$ , there were at most 2 false discoveries for approximately every 10 extra findings using the Bayesian threshold. This seems very beneficial in our model.

Therefore, we felt our choice of parameters (the green line in Figure S4, where  $V_n$  is the standard error,  $W = 0.42^2$ ,  $\pi_0 = 1 - 500/1,000,000$  and  $R = 10$ ) for our Bayesian threshold for  $R_1$  and  $S_1$  were appropriate for the approach in EMIM with the ASD datasets we are analysing here.

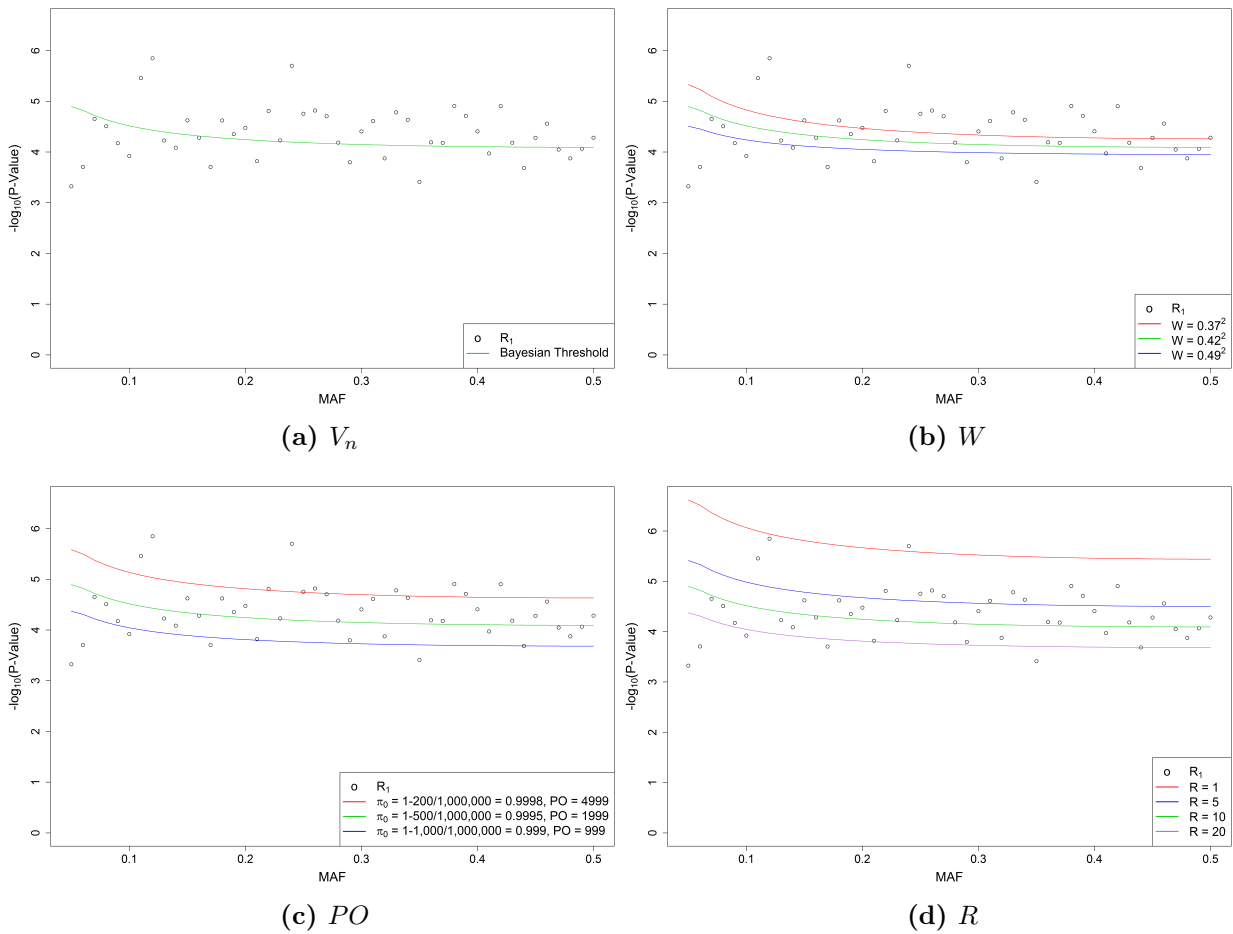

**Figure S4: Sensitivity of the Bayesian Threshold**, where  $V_n$  is the standard error that depends on MAF and sample size ( $n = 1,594$  here),  $W = 0.42^2$ ,  $\pi_0 = 1 - 500/1,000,000$  ( $PO = 1,999$ ) and  $R = 10$ , unless otherwise stated

# Results

## AGP Spectrum Results

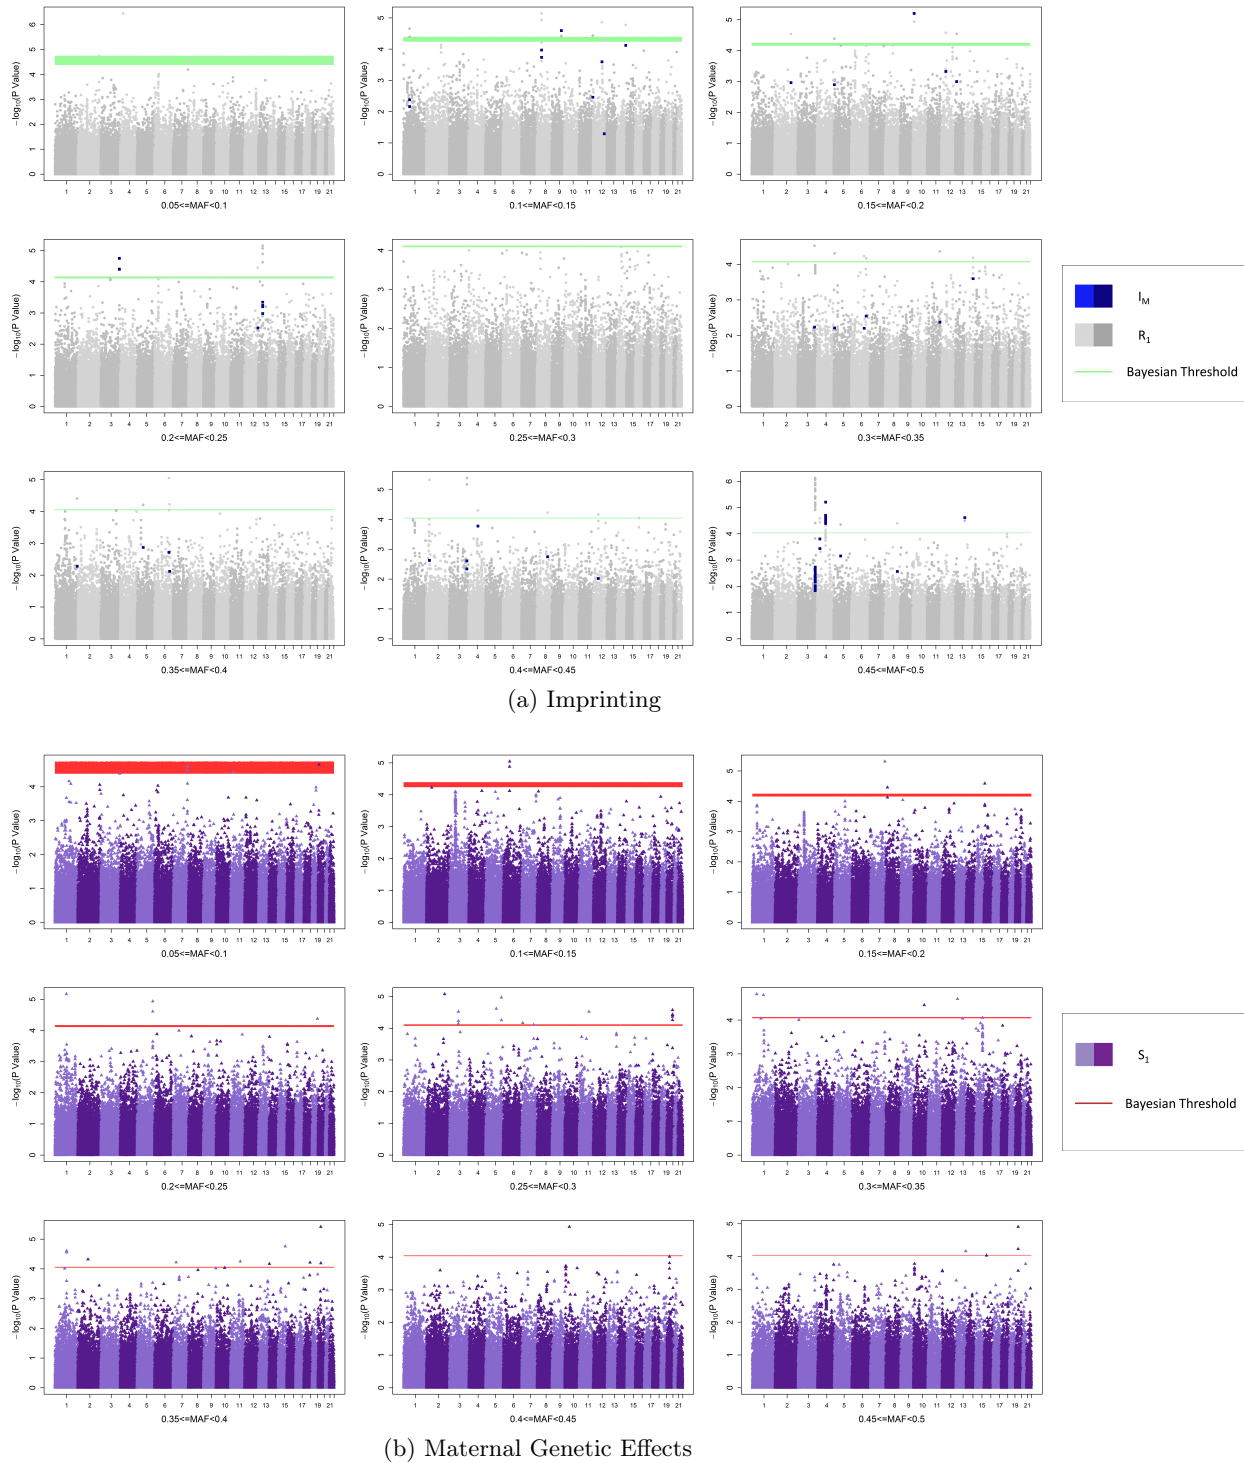

Figure S5: Manhattan Plots for Imprinting (Figure S5 (a)) and Maternal Genetic Effects (Figure S5 (b)) for Spectrum Phenotype in the AGP Dataset

**Table S4: Imprinting Results in the AGP Spectrum dataset & corresponding findings in the SSC Spectrum dataset**

| SNP        | Chr | MAF  | $R_1$ | PV                    | $R_1$ | AGP Results           |      |                       | Gene                  | Threshold        | Gene       | SSC Results |      |       |       |      |       |       |      |
|------------|-----|------|-------|-----------------------|-------|-----------------------|------|-----------------------|-----------------------|------------------|------------|-------------|------|-------|-------|------|-------|-------|------|
|            |     |      |       |                       |       | $S_1$                 | PV   | $S_1$                 |                       |                  |            | $I_M$       | PV   | $I_M$ | $R_1$ | PV   | $R_1$ | $S_1$ | PV   |
| rs675680   | 4   | 0.06 | 0.52  | $3.58 \times 10^{-7}$ | 0.64  | $1.77 \times 10^{-4}$ | 2.36 | $3.02 \times 10^{-6}$ | $3.20 \times 10^{-5}$ | NA               | rs675680   | 1           | 0.06 | 1.15  | 0.28  | 1.25 | 0.07  | 0.81  | 0.24 |
| rs10025482 | 4   | 0.49 | 1.33  | $4.49 \times 10^{-5}$ | 1.29  | $3.71 \times 10^{-4}$ | 0.59 | $6.21 \times 10^{-6}$ | $1.05 \times 10^{-4}$ | <i>C4orf37</i>   | rs6854802  | 1           | 0.48 | 0.93  | 0.28  | 0.88 | 0.07  | 1.19  | 0.15 |
| rs11256141 | 10  | 0.16 | 0.69  | $1.17 \times 10^{-5}$ | 0.74  | $1.98 \times 10^{-4}$ | 1.77 | $6.23 \times 10^{-6}$ | $7.36 \times 10^{-5}$ | <i>LINC00709</i> | rs11256141 | 1           | 0.16 | 0.93  | 0.37  | 1.08 | 0.34  | 0.95  | 0.71 |
| rs1491994  | 3   | 0.24 | 0.73  | $1.82 \times 10^{-5}$ | 0.83  | $1.06 \times 10^{-2}$ | 1.63 | $1.76 \times 10^{-5}$ | $8.90 \times 10^{-5}$ | <i>CLDN16</i>    | NA         | 0           |      |       |       |      |       |       |      |
| rs2031836  | 13  | 0.46 | 1.34  | $3.16 \times 10^{-5}$ | 1.32  | $6.83 \times 10^{-5}$ | 0.62 | $2.41 \times 10^{-5}$ | $1.05 \times 10^{-4}$ | NA               | rs2031836  | 1           | 0.46 | 0.96  | 0.55  | 1.00 | 0.98  | 1.10  | 0.42 |
| rs17683817 | 5   | 0.16 | 1.40  | $6.85 \times 10^{-5}$ | 1.30  | $2.48 \times 10^{-3}$ | 0.58 | $2.45 \times 10^{-5}$ | $7.31 \times 10^{-5}$ | <i>WDR41</i>     | rs17683817 | 1           | 0.15 | 0.90  | 0.19  | 0.77 | 0.00  | 1.23  | 0.12 |
| rs10491726 | 9   | 0.12 | 0.68  | $3.78 \times 10^{-5}$ | 0.76  | $2.58 \times 10^{-3}$ | 1.81 | $2.55 \times 10^{-5}$ | $5.97 \times 10^{-5}$ | <i>PTGRI</i>     | rs10491726 | 1           | 0.10 | 0.89  | 0.23  | 0.87 | 0.17  | 1.22  | 0.18 |
| rs807566   | 14  | 0.15 | 0.69  | $1.69 \times 10^{-5}$ | 0.72  | $1.61 \times 10^{-4}$ | 1.69 | $7.57 \times 10^{-5}$ | $7.63 \times 10^{-5}$ | <i>BCL11B</i>    | rs807566   | 1           | 0.14 | 1.01  | 0.88  | 1.09 | 0.34  | 0.92  | 0.55 |
| rs9671845  | 14  | 0.29 | 0.75  | $8.12 \times 10^{-5}$ | 0.81  | $3.22 \times 10^{-3}$ | 1.57 | $8.22 \times 10^{-5}$ | $9.55 \times 10^{-5}$ | NA               | rs10139853 | 0.96        | 0.30 | 1.00  | 0.98  | 0.66 | 1.05  | 0.66  | 0.66 |

$R_1$  denotes the relative risk for the offspring having one copy of the variant allele,  $S_1$  denotes the relative risk for the mother having one copy of the variant allele,  $I_M$  denotes the relative risk for a maternal over-transmission of the allele, and  $PV$  denotes p-value.

**Table S5: Maternal Genetic Effects Results in the AGP Spectrum dataset & corresponding findings in the SSC Spectrum dataset**

| AGP Results |     |      |                |                       |                |                       |                |                       |                          |                     |            |                | SSC Results |                |                   |                |                   |                |                   |
|-------------|-----|------|----------------|-----------------------|----------------|-----------------------|----------------|-----------------------|--------------------------|---------------------|------------|----------------|-------------|----------------|-------------------|----------------|-------------------|----------------|-------------------|
| SNP         | Chr | MAF  | R <sub>1</sub> | PV R <sub>1</sub>     | S <sub>1</sub> | PV S <sub>1</sub>     | I <sub>M</sub> | PV I <sub>M</sub>     | S <sub>1</sub> Threshold | Gene                | SNP        | R <sup>2</sup> | MAF         | R <sub>1</sub> | PV R <sub>1</sub> | S <sub>1</sub> | PV S <sub>1</sub> | I <sub>M</sub> | PV I <sub>M</sub> |
| rs2268949   | 20  | 0.39 | 1.26           | 1.40x10 <sup>-3</sup> | 1.39           | 3.84x10 <sup>-6</sup> | 0.68           | 6.32x10 <sup>-4</sup> | 1.03x10 <sup>-4</sup>    | NA                  | rs2268949  | 1              | 0.38        | 0.92           | 0.25              | 0.98           | 0.77              | 1.14           | 0.26              |
| rs6965442   | 7   | 0.19 | 1.31           | 1.00x10 <sup>-3</sup> | 1.45           | 4.85x10 <sup>-6</sup> | 0.69           | 1.92x10 <sup>-3</sup> | 8.16x10 <sup>-5</sup>    | <i>LOC729986</i>    | rs6965442  | 1              | 0.18        | 1.07           | 0.4               | 1.01           | 0.87              | 0.87           | 0.27              |
| rs6677933   | 1   | 0.2  | 0.76           | 3.20x10 <sup>-4</sup> | 0.71           | 6.83x10 <sup>-6</sup> | 1.63           | 5.02x10 <sup>-5</sup> | 8.20x10 <sup>-5</sup>    | NA                  | rs6677933  | 1              | 0.21        | 1.01           | 0.9               | 0.99           | 0.85              | 1.09           | 0.47              |
| rs4637047   | 2   | 0.25 | 0.84           | 1.21x10 <sup>-2</sup> | 0.72           | 8.40x10 <sup>-6</sup> | 1.33           | 1.20x10 <sup>-2</sup> | 9.03x10 <sup>-5</sup>    | NA                  | NA         | 0              |             |                |                   |                |                   |                |                   |
| rs9462733   | 6   | 0.15 | 1.21           | 4.56x10 <sup>-2</sup> | 1.49           | 9.02x10 <sup>-6</sup> | 0.69           | 6.02x10 <sup>-3</sup> | 6.99x10 <sup>-5</sup>    | NA                  | NA         | 0              |             |                |                   |                |                   |                |                   |
| rs4516878   | 10  | 0.24 | 1.21           | 1.43x10 <sup>-2</sup> | 1.4            | 1.16x10 <sup>-5</sup> | 0.72           | 4.37x10 <sup>-3</sup> | 8.94x10 <sup>-5</sup>    | <i>CTC-340A15.2</i> | rs4516878  | 1              | 0.25        | 1.11           | 0.17              | 1.07           | 0.37              | 0.9            | 0.39              |
| rs1617306   | 5   | 0.45 | 1.29           | 6.80x10 <sup>-3</sup> | 1.35           | 1.17x10 <sup>-5</sup> | 0.69           | 9.90x10 <sup>-4</sup> | 1.05x10 <sup>-4</sup>    | NA                  | rs1617306  | 1              | 0.45        | 1.01           | 0.83              | 1.07           | 0.32              | 0.97           | 0.81              |
| rs9283909   | 6   | 0.11 | 1.29           | 1.16x10 <sup>-2</sup> | 1.53           | 1.31x10 <sup>-5</sup> | 0.59           | 2.36x10 <sup>-4</sup> | 5.82x10 <sup>-5</sup>    | NA                  | rs12526543 | 1              | 0.1         | 0.97           | 0.75              | 0.93           | 0.47              | 1.06           | 0.68              |
| rs2982502   | 1   | 0.3  | 0.92           | 2.24x10 <sup>-1</sup> | 0.74           | 1.70x10 <sup>-5</sup> | 1.31           | 1.50x10 <sup>-2</sup> | 9.64x10 <sup>-5</sup>    | <i>ZFP69B</i>       | rs2982502  | 1              | 0.32        | 1.13           | 0.08              | 1.14           | 0.07              | 0.78           | 0.03              |
| rs6496603   | 15  | 0.4  | 1.19           | 1.48x10 <sup>-2</sup> | 1.35           | 1.75x10 <sup>-5</sup> | 0.69           | 8.69x10 <sup>-4</sup> | 1.03x10 <sup>-4</sup>    | <i>ANPEP</i>        | NA         | 0              |             |                |                   |                |                   |                |                   |
| rs1277203   | 1   | 0.33 | 0.77           | 2.17x10 <sup>-4</sup> | 0.74           | 1.81x10 <sup>-5</sup> | 1.62           | 1.67x10 <sup>-5</sup> | 9.95x10 <sup>-5</sup>    | <i>AKNAD1</i>       | rs1277203  | 1              | 0.35        | 1.03           | 0.71              | 0.93           | 0.31              | 1.02           | 0.87              |
| rs8113869   | 20  | 0.09 | 0.9            | 2.71x10 <sup>-1</sup> | 0.64           | 2.21x10 <sup>-5</sup> | 1.51           | 6.04x10 <sup>-3</sup> | 4.68x10 <sup>-5</sup>    | <i>LINC00658</i>    | rs8113869  | 1              | 0.1         | 0.95           | 0.6               | 0.93           | 0.49              | 1.19           | 0.24              |
| rs2183284   | 13  | 0.32 | 0.82           | 4.58x10 <sup>-3</sup> | 0.74           | 2.35x10 <sup>-5</sup> | 1.43           | 1.75x10 <sup>-3</sup> | 9.88x10 <sup>-5</sup>    | <i>LINC00426</i>    | rs2183284  | 1              | 0.35        | 1.02           | 0.78              | 0.99           | 0.94              | 1.04           | 0.72              |
| rs3891371   | 5   | 0.25 | 0.8            | 1.71x10 <sup>-3</sup> | 0.73           | 2.42x10 <sup>-5</sup> | 1.68           | 6.59x10 <sup>-6</sup> | 9.07x10 <sup>-5</sup>    | <i>KCNN2</i>        | NA         | 0              |             |                |                   |                |                   |                |                   |
| rs7778273   | 7   | 0.08 | 1.34           | 9.50x10 <sup>-3</sup> | 1.6            | 2.52x10 <sup>-5</sup> | 0.55           | 1.94x10 <sup>-4</sup> | 4.51x10 <sup>-5</sup>    | <i>CUL1</i>         | rs7778273  | 1              | 0.08        | 1              | 0.97              | 1.05           | 0.69              | 1.03           | 0.88              |
| rs3848375   | 16  | 0.18 | 0.81           | 7.13x10 <sup>-3</sup> | 0.72           | 2.59x10 <sup>-5</sup> | 1.37           | 9.19x10 <sup>-3</sup> | 7.82x10 <sup>-5</sup>    | <i>MGRN1</i>        | rs3848374  | 0.96           | 0.27        | 1.05           | 0.52              | 0.86           | 0.06              | 1.22           | 0.1               |
| rs6021903   | 20  | 0.26 | 0.86           | 3.91x10 <sup>-2</sup> | 0.74           | 2.66x10 <sup>-5</sup> | 1.46           | 9.71x10 <sup>-4</sup> | 9.19x10 <sup>-5</sup>    | <i>LINC01524</i>    | rs968162   | 1              | 0.27        | 1.05           | 0.52              | 0.96           | 0.58              | 0.93           | 0.56              |
| rs1766862   | 1   | 0.39 | 0.79           | 6.90x10 <sup>-4</sup> | 0.75           | 2.78x10 <sup>-5</sup> | 1.47           | 3.81x10 <sup>-4</sup> | 1.03x10 <sup>-4</sup>    | <i>LRIG2</i>        | rs1766862  | 1              | 0.41        | 0.84           | 0.01              | 0.87           | 0.05              | 1.34           | 0.01              |
| rs5452208   | 11  | 0.25 | 0.83           | 8.35x10 <sup>-3</sup> | 0.74           | 3.00x10 <sup>-5</sup> | 1.39           | 4.70x10 <sup>-3</sup> | 9.10x10 <sup>-5</sup>    | <i>MAML2</i>        | rs5452208  | 1              | 0.26        | 0.98           | 0.8               | 1.02           | 0.81              | 1.01           | 0.93              |
| rs2978880   | 8   | 0.18 | 0.79           | 2.75x10 <sup>-3</sup> | 0.72           | 3.49x10 <sup>-5</sup> | 1.45           | 2.42x10 <sup>-3</sup> | 7.90x10 <sup>-5</sup>    | <i>DEFB1</i>        | rs2978880  | 1              | 0.2         | 0.89           | 0.16              | 0.97           | 0.69              | 1.04           | 0.73              |
| rs2060792   | 10  | 0.31 | 0.88           | 5.83x10 <sup>-2</sup> | 0.74           | 3.59x10 <sup>-5</sup> | 1.31           | 1.92x10 <sup>-2</sup> | 9.72x10 <sup>-5</sup>    | <i>RP11-34D15.2</i> | rs2060792  | 1              | 0.32        | 1.06           | 0.45              | 0.98           | 0.82              | 1.12           | 0.34              |
| rs7128766   | 11  | 0.07 | 1.03           | 8.01x10 <sup>-1</sup> | 1.64           | 3.82x10 <sup>-5</sup> | 0.73           | 7.56x10 <sup>-2</sup> | 3.99x10 <sup>-5</sup>    | <i>NELL1</i>        | rs7128766  | 1              | 0.08        | 0.98           | 0.83              | 0.96           | 0.72              | 1.01           | 0.97              |
| rs10409120  | 19  | 0.23 | 0.86           | 3.77x10 <sup>-2</sup> | 0.73           | 4.20x10 <sup>-5</sup> | 1.61           | 5.22x10 <sup>-5</sup> | 8.42x10 <sup>-5</sup>    | <i>ZNF83</i>        | rs10409120 | 1              | 0.23        | 1.04           | 0.59              | 1.15           | 0.08              | 0.91           | 0.44              |
| rs11674199  | 2   | 0.37 | 0.86           | 2.94x10 <sup>-2</sup> | 0.75           | 4.75x10 <sup>-5</sup> | 1.42           | 3.42x10 <sup>-3</sup> | 1.02x10 <sup>-4</sup>    | <i>NPAS2</i>        | rs11674199 | 1              | 0.37        | 1.01           | 0.85              | 1.06           | 0.38              | 0.93           | 0.48              |
| rs1978763   | 11  | 0.34 | 0.83           | 9.16x10 <sup>-3</sup> | 0.75           | 5.58x10 <sup>-5</sup> | 1.38           | 5.08x10 <sup>-3</sup> | 1.00x10 <sup>-4</sup>    | <i>MAML2</i>        | rs1978763  | 1              | 0.35        | 0.94           | 0.38              | 0.97           | 0.65              | 1.08           | 0.5               |
| rs12622230  | 2   | 0.14 | 1.22           | 3.14x10 <sup>-2</sup> | 1.44           | 5.93x10 <sup>-5</sup> | 0.69           | 5.47x10 <sup>-3</sup> | 6.65x10 <sup>-5</sup>    | NA                  | rs12622230 | 1              | 0.13        | 0.97           | 0.77              | 1.08           | 0.42              | 0.97           | 0.85              |
| rs1174939   | 7   | 0.35 | 0.88           | 5.22x10 <sup>-2</sup> | 0.76           | 5.98x10 <sup>-5</sup> | 1.38           | 3.62x10 <sup>-3</sup> | 1.01x10 <sup>-4</sup>    | NA                  | rs1174939  | 1              | 0.36        | 0.96           | 0.55              | 0.92           | 0.23              | 1.2            | 0.11              |
| rs9959847   | 18  | 0.36 | 1.21           | 5.75x10 <sup>-3</sup> | 1.31           | 6.09x10 <sup>-5</sup> | 0.68           | 3.48x10 <sup>-4</sup> | 1.02x10 <sup>-4</sup>    | NA                  | rs9959847  | 1              | 0.37        | 0.92           | 0.27              | 0.91           | 0.21              | 1.15           | 0.24              |
| rs7150691   | 14  | 0.39 | 1.19           | 1.16x10 <sup>-2</sup> | 1.32           | 6.73x10 <sup>-5</sup> | 0.69           | 9.41x10 <sup>-4</sup> | 1.03x10 <sup>-4</sup>    | <i>TRAV37</i>       | rs7150691  | 1              | 0.39        | 1.08           | 0.31              | 1.03           | 0.67              | 0.94           | 0.59              |
| rs10486157  | 7   | 0.28 | 0.76           | 1.17x10 <sup>-4</sup> | 0.75           | 6.79x10 <sup>-5</sup> | 1.69           | 3.03x10 <sup>-6</sup> | 9.49x10 <sup>-5</sup>    | NA                  | rs10486157 | 1              | 0.28        | 0.96           | 0.56              | 0.89           | 0.11              | 1.08           | 0.49              |
| rs2031836   | 13  | 0.47 | 1.34           | 3.16x10 <sup>-5</sup> | 1.32           | 6.83x10 <sup>-5</sup> | 0.62           | 2.41x10 <sup>-5</sup> | 1.05x10 <sup>-4</sup>    | NA                  | rs2031836  | 1              | 0.46        | 0.96           | 0.55              | 1              | 0.98              | 1.1            | 0.42              |
| rs9870610   | 3   | 0.28 | 1.16           | 4.62x10 <sup>-2</sup> | 1.33           | 7.24x10 <sup>-5</sup> | 0.71           | 3.09x10 <sup>-3</sup> | 9.47x10 <sup>-5</sup>    | <i>ROBO2</i>        | rs9870610  | 1              | 0.25        | 1.03           | 0.7               | 1.16           | 0.05              | 0.86           | 0.2               |
| rs11975640  | 7   | 0.28 | 0.92           | 2.07x10 <sup>-1</sup> | 0.75           | 7.70x10 <sup>-5</sup> | 1.37           | 6.13x10 <sup>-3</sup> | 9.45x10 <sup>-5</sup>    | <i>SPAMI</i>        | rs11975640 | 1              | 0.31        | 0.91           | 0.2               | 0.82           | 0.01              | 1.27           | 0.04              |
| rs4885749   | 13  | 0.33 | 1.2            | 1.08x10 <sup>-2</sup> | 1.32           | 8.97x10 <sup>-5</sup> | 0.67           | 5.08x10 <sup>-4</sup> | 9.90x10 <sup>-5</sup>    | NA                  | rs4885749  | 1              | 0.32        | 1.06           | 0.42              | 0.96           | 0.54              | 1              | 1                 |
| rs2066197   | 1   | 0.34 | 0.78           | 1.55x10 <sup>-4</sup> | 0.77           | 8.99x10 <sup>-5</sup> | 1.42           | 9.49x10 <sup>-4</sup> | 1.00x10 <sup>-4</sup>    | NA                  | rs2066197  | 1              | 0.33        | 1.22           | 0.01              | 1.14           | 0.07              | 0.76           | 0.02              |
| rs7921660   | 10  | 0.39 | 0.8            | 1.22x10 <sup>-3</sup> | 0.77           | 9.25x10 <sup>-5</sup> | 1.59           | 1.81x10 <sup>-5</sup> | 1.03x10 <sup>-4</sup>    | NA                  | rs7921660  | 1              | 0.38        | 1              | 0.98              | 1.03           | 0.66              | 1.03           | 0.78              |
| rs1908211   | 16  | 0.44 | 0.88           | 6.02x10 <sup>-2</sup> | 0.76           | 9.31x10 <sup>-5</sup> | 1.38           | 5.31x10 <sup>-3</sup> | 1.05x10 <sup>-4</sup>    | NA                  | NA         | 0              |             |                |                   |                |                   |                |                   |
| rs28498266  | 9   | 0.38 | 0.91           | 1.93x10 <sup>-1</sup> | 0.76           | 9.52x10 <sup>-5</sup> | 1.34           | 1.02x10 <sup>-2</sup> | 1.02x10 <sup>-4</sup>    | <i>RNU6ATAC</i>     | rs28498266 | 1              | 0.39        | 1.22           | 0.01              | 1.18           | 0.02              | 0.73           | 0.01              |
| rs1245481   | 1   | 0.4  | 1.25           | 1.09x10 <sup>-3</sup> | 1.31           | 9.72x10 <sup>-5</sup> | 0.66           | 1.77x10 <sup>-4</sup> | 1.04x10 <sup>-4</sup>    | <i>LINC01057</i>    | rs1245481  | 1              | 0.38        | 0.94           | 0.4               | 1.02           | 0.82              | 1.05           | 0.66              |
| rs4684385   | 3   | 0.35 | 1.17           | 2.07x10 <sup>-2</sup> | 1.31           | 9.86x10 <sup>-5</sup> | 0.71           | 1.43x10 <sup>-3</sup> | 1.01x10 <sup>-4</sup>    | NA                  | rs4684385  | 1              | 0.34        | 1.13           | 0.1               | 1.09           | 0.24              | 0.85           | 0.18              |

R<sub>1</sub> denotes the relative risk for the offspring having one copy of the variant allele, S<sub>1</sub> denotes the relative risk for the mother having one copy of the variant allele, I<sub>M</sub> denotes the relative risk for a maternal over-transmission of the allele, and PV denotes p-value.

Figure S6 gives the QQ plots for  $I_M$  and  $S_1$  in the AGP Spectrum dataset.

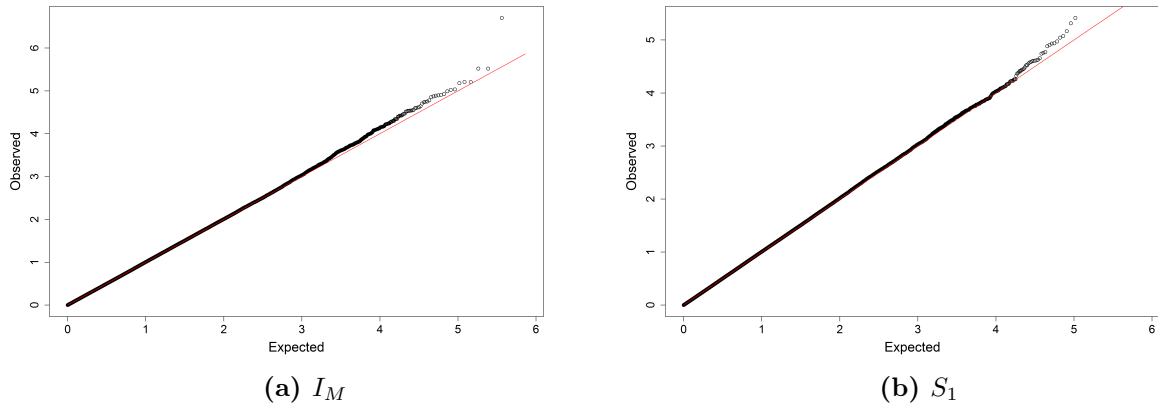

Figure S6: QQ plots for AGP Spectrum dataset

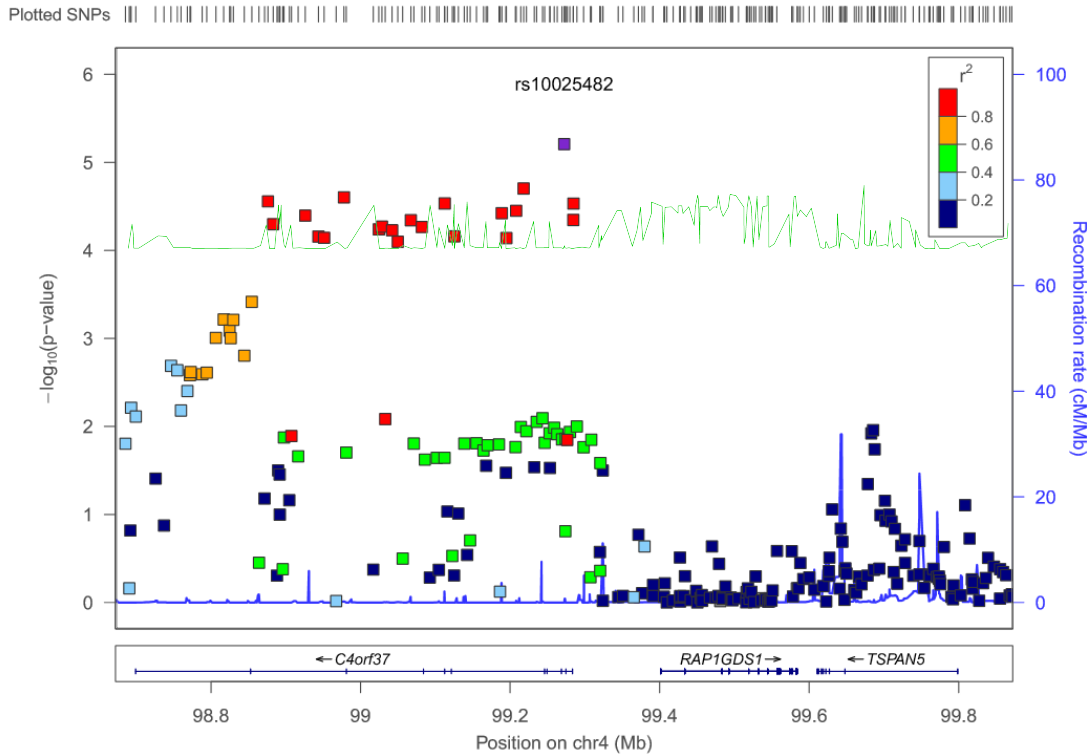

Figure S7: AGP Spectrum Chromosome 4, rs10025482 Paternal Over-Transmission. Regional plot of SNPs highlighted in the AGP Spectrum analysis for imprinting result when the association is above the Bayesian threshold for  $R_1$  (green line). Index SNP rs10025482 is shown in purple. Markers in linkage disequilibrium with the index SNP are shown and based on 1000 genomes CEU. Recombination rate plotted in blue.

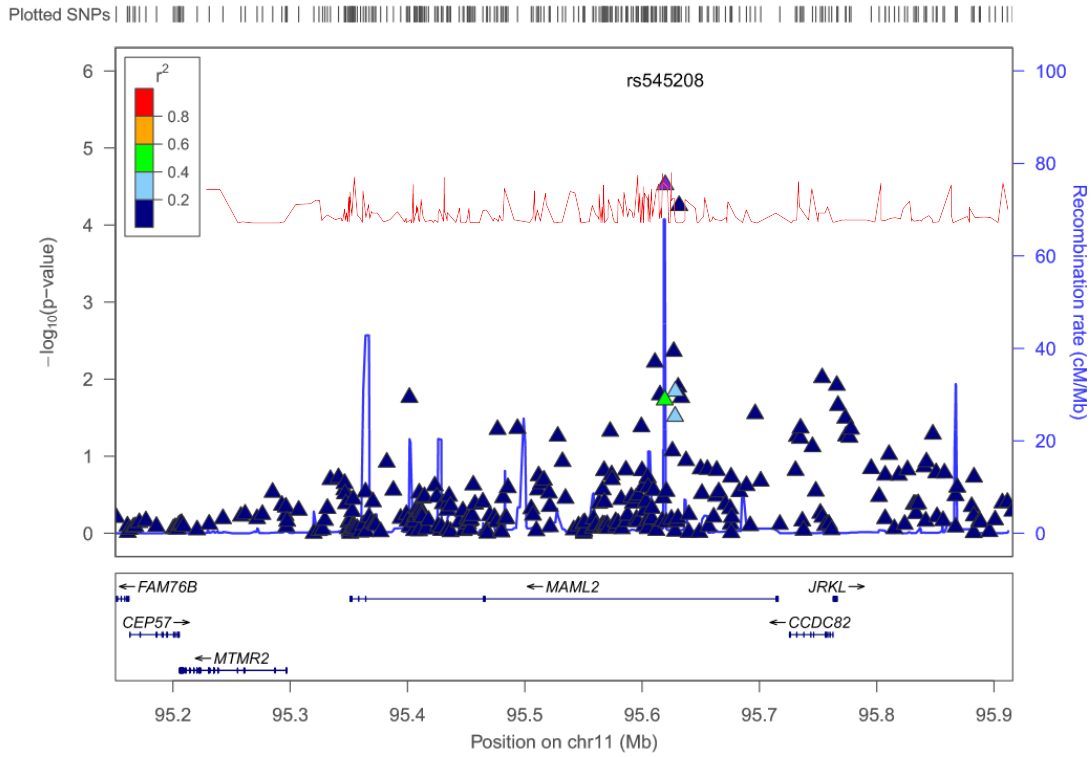

**Figure S8: AGP Spectrum Chromosome 11, rs545208 Maternal Genetic Effect.** Regional plot of SNPs highlighted in the AGP Spectrum analysis for maternal genetic effects ( $S_1$ , triangles). Index SNP rs545208 is shown in purple. Markers in linkage disequilibrium with the index SNP are shown and based on 1000 genomes CEU. Recombination rate plotted in blue. The red line represents the Bayesian threshold for  $S_1$ .

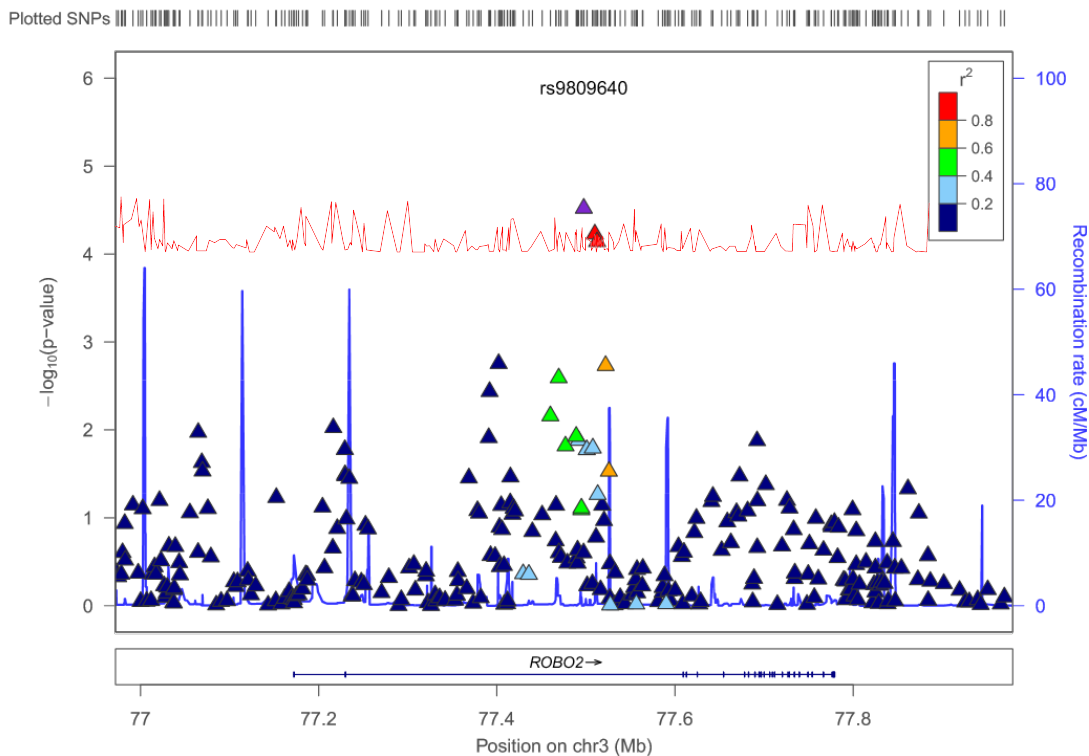

**Figure S9: AGP Spectrum Chromosome 3, rs9809640 Maternal Genetic Effect.** Regional plot of SNPs highlighted in the AGP Spectrum analysis for maternal genetic effects ( $S_1$ , triangles). Index SNP rs9809640 is shown in purple. Markers in linkage disequilibrium with the index SNP are shown and based on 1000 genomes CEU. Recombination rate plotted in blue. The red line represents the Bayesian threshold for  $S_1$ .

## AGP Strict Results

There were seven noteworthy imprinting results and there were forty-eight independent loci with a maternal genetic effect above the  $S_1$  threshold (four of which overlap with AGP Spectrum results), see the Manhattan plots (Figure S10) and Tables S6 and S7 for all hits that were above the threshold for offspring genetic effects ( $R_1$ ) and imprinting ( $I_M$ ) or were above the threshold for maternal genetic effects ( $S_1$ ). Figure S15 gives an the overlap of findings that where above the threshold in both the AGP Strict and AGP Spectrum. (Note that many findings where above the threshold in one of the phenotypes and close but not above the threshold in the other phenotype



and hence. were not considered to be noteworthy findings.) Figure S14 gives the QQ plots for  $I_M$  and  $S_1$  in the AGP Strict dataset.

## Imprinting Results

Our strongest associations showed evidence for paternal over-transmission and a maternal genetic effect on chromosome 7p in an intergenic region between *LOC100419776* and *EPS15P1* (rs1525240,  $I_M = 0.47$ , Wald p-value =  $3.8 \times 10^{-7}$ ,  $S_1 = 1.53$ , Wald p-value =  $1.4 \times 10^{-5}$ , see Figure S11). This region was previously linked with a *de novo* mutation in ASD [22]. One of our top hits for maternal over-transmission on chromosome 18 between *DSEL* and *LOC100129135* (rs395393,  $I_M = 1.73$ , Wald p-value =  $9.81 \times 10^{-5}$ , see Figure S12) was previously implicated for maternal genetic effects [23] ( $R^2 = 0.235$  between rs395393 and rs7242936), but the authors did not consider imprinting in their analysis which can mimic maternal genetic effects [5, 24]. Note, the maternal genetic effect found at rs7242936 in [23] was found in a merged dataset consisting of AGRE and SSC samples, so there is some overlap of the samples in [23] and ours (as the AGP contains samples from AGRE).

## Maternal Genetic Results

We found evidence for a maternal genetic effect and paternal over-transmission on chromosome 15q15.1 in the *MGA* gene (rs16971976,  $S_1 = 1.58$ , Wald p-value =  $3.9 \times 10^{-7}$ ,  $I_M = 0.53$ , Wald p-value =  $9.1 \times 10^{-6}$ , see Figure S13). This region was previously linked with ASD in a linkage study [25]. Note there is again potential for small overlap with the samples in [25] and ours as [25] analysed the AGRE dataset.

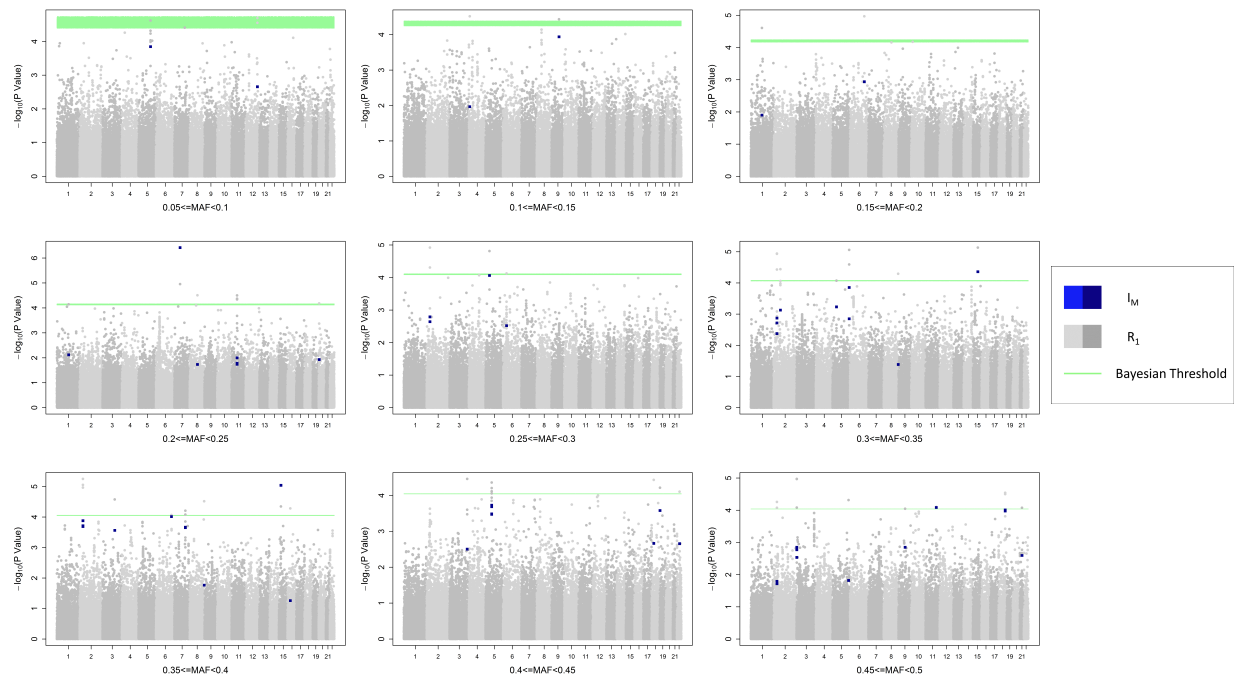

(a) Imprinting

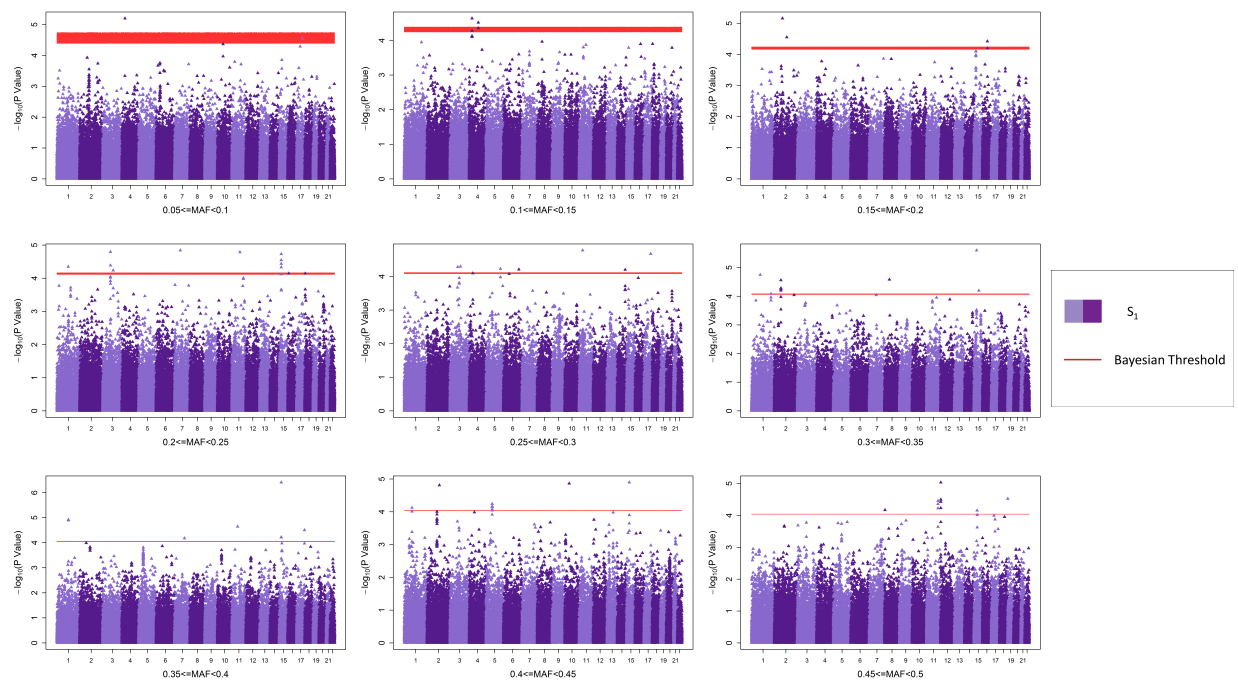

(b) Maternal Genetic Effects

**Figure S10: Manhattan Plots for Imprinting (Figure S10 (a)) and Maternal Genetic Effects (Figure S10 (b)) for Strict Phenotype in the AGP Dataset**

**Table S6: Imprinting Results in the AGP Strict dataset & corresponding findings in the SSC Strict dataset**

| SNP        | Chr | MAF  | $R_1$ | PV                    | $R_1$ | AGP Results           |      |                       |                       | Gene | Threshold  | SSC Results |       |       |       |      |       |       |      |
|------------|-----|------|-------|-----------------------|-------|-----------------------|------|-----------------------|-----------------------|------|------------|-------------|-------|-------|-------|------|-------|-------|------|
|            |     |      |       |                       |       | $S_1$                 | PV   | $S_1$                 | $I_M$                 |      |            | PV          | $R_1$ | $S_1$ | $I_M$ | PV   | $R_1$ | $S_1$ | PV   |
| rs1525240  | 7   | 0.24 | 1.53  | 1.11x10 <sup>-5</sup> | 1.52  | 1.44x10 <sup>-5</sup> | 0.47 | 3.83x10 <sup>-7</sup> | 8.88x10 <sup>-5</sup> | NA   | rs1525240  | 1           | 0.25  | 0.94  | 0.49  | 0.91 | 0.28  | 1.23  | 0.12 |
| rs16971976 | 15  | 0.36 | 1.45  | 4.49x10 <sup>-5</sup> | 1.58  | 3.90x10 <sup>-7</sup> | 0.53 | 9.09x10 <sup>-6</sup> | 1.01x10 <sup>-4</sup> | MGA  | rs16971976 | 1           | 0.37  | 1.02  | 0.80  | 1.08 | 0.30  | 0.94  | 0.61 |
| rs8025806  | 15  | 0.31 | 1.48  | 7.37x10 <sup>-6</sup> | 1.42  | 6.40x10 <sup>-5</sup> | 0.57 | 4.37x10 <sup>-5</sup> | 9.74x10 <sup>-5</sup> | NA   | rs8025806  | 1           | 0.30  | 1.10  | 0.24  | 1.07 | 0.42  | 0.94  | 0.63 |
| rs1016081  | 11  | 0.49 | 1.42  | 7.95x10 <sup>-5</sup> | 1.33  | 1.27x10 <sup>-3</sup> | 0.56 | 8.22x10 <sup>-5</sup> | 1.05x10 <sup>-4</sup> | NA   | rs1016081  | 1           | 0.49  | 0.97  | 0.72  | 1.01 | 0.89  | 1.04  | 0.78 |
| rs1423431  | 5   | 0.28 | 1.50  | 1.54x10 <sup>-5</sup> | 1.39  | 4.13x10 <sup>-4</sup> | 0.56 | 8.65x10 <sup>-5</sup> | 9.46x10 <sup>-5</sup> | NA   | rs1423431  | 1           | 0.27  | 1.02  | 0.84  | 1.18 | 0.04  | 0.86  | 0.24 |
| rs325105   | 6   | 0.39 | 0.70  | 8.55x10 <sup>-5</sup> | 0.73  | 3.33x10 <sup>-4</sup> | 1.76 | 9.67x10 <sup>-5</sup> | 1.03x10 <sup>-4</sup> | NA   | rs325105   | 1           | 0.39  | 1.02  | 0.77  | 1.04 | 0.61  | 0.89  | 0.37 |
| rs395393   | 18  | 0.48 | 0.69  | 2.88x10 <sup>-5</sup> | 0.79  | 5.78x10 <sup>-3</sup> | 1.73 | 9.81x10 <sup>-5</sup> | 1.05x10 <sup>-4</sup> | NA   | rs395393   | 1           | 0.48  | 1.04  | 0.60  | 1.00 | 0.98  | 0.86  | 0.26 |

$R_1$  denotes the relative risk for the offspring having one copy of the variant allele,  $S_1$  denotes the relative risk for the mother having one copy of the variant allele,  $I_M$  denotes the relative risk for a maternal over-transmission of the allele, and PV denotes p-value.

**Table S7: Maternal Genetic Effects Results in the AGP Strict dataset & corresponding findings in the SSC Strict dataset**

| SNP        | Chr | AGP Results |                |                       |                |                       |                |                       |                       |                       |                | SSC Results |      |      |                |      |                |      |                |      |                |                |      |                |
|------------|-----|-------------|----------------|-----------------------|----------------|-----------------------|----------------|-----------------------|-----------------------|-----------------------|----------------|-------------|------|------|----------------|------|----------------|------|----------------|------|----------------|----------------|------|----------------|
|            |     | MAF         | R <sub>1</sub> | PV                    | S <sub>1</sub> | PV                    | S <sub>1</sub> | I <sub>M</sub>        | PV                    | I <sub>M</sub>        | S <sub>1</sub> | Threshold   | Gene | SNP  | R <sup>2</sup> | MAF  | R <sub>1</sub> | PV   | S <sub>1</sub> | PV   | S <sub>1</sub> | I <sub>M</sub> | PV   | I <sub>M</sub> |
| rs16971976 | 15  | 0.37        | 1.45           | 4.49x10 <sup>-5</sup> | 1.58           | 3.90x10 <sup>-7</sup> | 0.53           | 9.09x10 <sup>-6</sup> | 1.02x10 <sup>-4</sup> | 1.02x10 <sup>-4</sup> | MGA            | rs16971976  | 1    | 0.37 | 1.02           | 0.80 | 1.08           | 1.08 | 1.08           | 0.30 | 0.94           | 0.61           | 0.94 | 0.61           |
| rs12591300 | 15  | 0.36        | 1.33           | 1.60x10 <sup>-3</sup> | 1.52           | 2.51x10 <sup>-6</sup> | 0.58           | 1.56x10 <sup>-4</sup> | 1.02x10 <sup>-4</sup> | 1.02x10 <sup>-4</sup> | FAM227B        | rs10519225  | 0.90 | 0.36 | 1.24           | 0.01 | 1.14           | 1.14 | 1.14           | 0.11 | 0.76           | 0.04           | 0.76 | 0.04           |
| rs675680   | 4   | 0.05        | 0.52           | 5.49x10 <sup>-5</sup> | 0.47           | 6.30x10 <sup>-6</sup> | 3.30           | 1.10x10 <sup>-6</sup> | 2.78x10 <sup>-5</sup> | 2.78x10 <sup>-5</sup> | RP11-129O22.1  | rs675680    | 1    | 0.06 | 1.27           | 0.08 | 1.31           | 1.31 | 1.31           | 0.05 | 0.73           | 0.11           | 0.73 | 0.11           |
| rs25599081 | 2   | 0.17        | 1.28           | 2.87x10 <sup>-2</sup> | 1.65           | 6.91x10 <sup>-6</sup> | 0.67           | 1.34x10 <sup>-2</sup> | 7.63x10 <sup>-5</sup> | 7.63x10 <sup>-5</sup> | DYSF           | rs25599081  | 1    | 0.17 | 1.05           | 0.58 | 1.12           | 1.12 | 1.12           | 0.24 | 0.84           | 0.25           | 0.84 | 0.25           |
| rs1044471  | 12  | 0.45        | 0.77           | 2.59x10 <sup>-3</sup> | 0.68           | 9.18x10 <sup>-6</sup> | 1.73           | 6.14x10 <sup>-5</sup> | 1.05x10 <sup>-4</sup> | 1.05x10 <sup>-4</sup> | ADIPO2         | rs1044471   | 1    | 0.46 | 0.98           | 0.81 | 0.98           | 0.98 | 0.81           | 0.81 | 1.12           | 0.36           | 1.12 | 0.36           |
| rs1778015  | 1   | 0.38        | 0.81           | 1.14x10 <sup>-2</sup> | 0.68           | 1.21x10 <sup>-5</sup> | 1.66           | 3.08x10 <sup>-4</sup> | 1.03x10 <sup>-4</sup> | 1.03x10 <sup>-4</sup> | NA             | rs1778015   | 1    | 0.41 | 0.86           | 0.06 | 0.87           | 0.87 | 0.07           | 0.77 | 1.30           | 0.05           | 1.30 | 0.05           |
| rs1525240  | 10  | 0.45        | 1.27           | 7.99x10 <sup>-3</sup> | 1.47           | 1.37x10 <sup>-5</sup> | 0.63           | 1.60x10 <sup>-3</sup> | 1.05x10 <sup>-4</sup> | 1.05x10 <sup>-4</sup> | NA             | rs1525240   | 1    | 0.46 | 1.03           | 0.71 | 1.08           | 1.08 | 0.34           | 0.97 | 1.23           | 0.12           | 1.23 | 0.12           |
| rs4611601  | 7   | 0.24        | 1.53           | 1.11x10 <sup>-5</sup> | 1.52           | 1.44x10 <sup>-5</sup> | 0.47           | 3.83x10 <sup>-7</sup> | 1.03x10 <sup>-4</sup> | 1.03x10 <sup>-4</sup> | MYO7B          | rs4611601   | 1    | 0.41 | 0.90           | 0.18 | 0.88           | 0.88 | 0.10           | 1.17 | 0.22           | 1.17           | 0.22 |                |
| rs7628838  | 3   | 0.24        | 1.29           | 8.14x10 <sup>-3</sup> | 1.51           | 1.59x10 <sup>-5</sup> | 0.63           | 1.25x10 <sup>-3</sup> | 8.89x10 <sup>-5</sup> | 8.89x10 <sup>-5</sup> | SUCLG2         | rs4856867   | 0.96 | 0.21 | 0.96           | 0.62 | 0.96           | 0.66 | 1.08           | 0.56 | 1.08           | 0.56           |      |                |
| rs10897779 | 11  | 0.21        | 0.81           | 2.30x10 <sup>-2</sup> | 0.66           | 1.63x10 <sup>-5</sup> | 1.53           | 4.43x10 <sup>-3</sup> | 8.44x10 <sup>-5</sup> | 8.44x10 <sup>-5</sup> | NA             | rs10897779  | 1    | 0.24 | 0.97           | 0.74 | 1.10           | 1.10 | 0.25           | 0.91 | 0.48           | 1.08           | 0.48 |                |
| rs7945103  | 11  | 0.25        | 0.78           | 5.28x10 <sup>-3</sup> | 0.68           | 1.67x10 <sup>-5</sup> | 1.65           | 3.25x10 <sup>-4</sup> | 9.14x10 <sup>-5</sup> | 9.14x10 <sup>-5</sup> | NA             | rs7945103   | 1    | 0.26 | 1.20           | 0.03 | 1.22           | 1.22 | 0.44           | 0.82 | 0.14           | 0.82           | 0.14 |                |
| rs2066197  | 1   | 0.32        | 0.73           | 2.52x10 <sup>-4</sup> | 0.69           | 1.79x10 <sup>-5</sup> | 1.57           | 8.41x10 <sup>-4</sup> | 9.88x10 <sup>-5</sup> | 9.88x10 <sup>-5</sup> | NA             | rs2066197   | 1    | 0.33 | 1.21           | 0.02 | 1.07           | 1.07 | 0.44           | 0.87 | 0.81           | 0.97           | 0.81 |                |
| rs10512561 | 17  | 0.31        | 1.27           | 1.12x10 <sup>-2</sup> | 1.47           | 2.12x10 <sup>-5</sup> | 0.59           | 3.71x10 <sup>-4</sup> | 9.77x10 <sup>-5</sup> | 9.77x10 <sup>-5</sup> | NA             | rs10512561  | 1    | 0.32 | 1.03           | 0.68 | 1.01           | 1.01 | 0.87           | 0.97 | 0.81           | 0.97           | 0.81 |                |
| rs1622278  | 11  | 0.38        | 0.86           | 7.59x10 <sup>-2</sup> | 0.68           | 2.27x10 <sup>-5</sup> | 1.56           | 2.10x10 <sup>-3</sup> | 1.02x10 <sup>-4</sup> | 1.02x10 <sup>-4</sup> | FADS2P1        | rs1622278   | 1    | 0.39 | 1.13           | 0.12 | 1.08           | 1.08 | 0.34           | 0.80 | 0.09           | 0.80           | 0.09 |                |
| rs315688   | 4   | 0.14        | 1.22           | 9.48x10 <sup>-2</sup> | 1.62           | 2.30x10 <sup>-5</sup> | 0.55           | 7.87x10 <sup>-4</sup> | 6.91x10 <sup>-5</sup> | 6.91x10 <sup>-5</sup> | ZCCHC4         | rs315688    | 1    | 0.15 | 0.99           | 0.94 | 1.03           | 1.03 | 0.76           | 0.89 | 0.41           | 0.89           | 0.41 |                |
| rs7818821  | 8   | 0.29        | 0.77           | 2.65x10 <sup>-3</sup> | 0.69           | 2.61x10 <sup>-5</sup> | 1.64           | 3.64x10 <sup>-4</sup> | 9.56x10 <sup>-5</sup> | 9.56x10 <sup>-5</sup> | NRG1           | rs7818821   | 1    | 0.30 | 0.97           | 0.66 | 0.94           | 0.94 | 0.43           | 1.10 | 0.47           | 1.10           | 0.47 |                |
| rs1863047  | 2   | 0.36        | 1.33           | 1.84x10 <sup>-3</sup> | 1.47           | 2.75x10 <sup>-5</sup> | 0.63           | 1.38x10 <sup>-3</sup> | 1.01x10 <sup>-4</sup> | 1.01x10 <sup>-4</sup> | NA             | rs17188812  | 0.97 | 0.35 | 0.91           | 0.25 | 0.93           | 0.93 | 0.39           | 1.30 | 0.04           | 1.30           | 0.04 |                |
| rs11683368 | 2   | 0.21        | 1.44           | 4.01x10 <sup>-4</sup> | 1.54           | 2.79x10 <sup>-5</sup> | 0.63           | 2.13x10 <sup>-3</sup> | 8.38x10 <sup>-5</sup> | 8.38x10 <sup>-5</sup> | NA             | rs11683368  | 1    | 0.17 | 1.07           | 0.49 | 1.01           | 1.01 | 0.92           | 1.01 | 0.92           | 1.01           | 0.92 |                |
| rs3744103  | 17  | 0.07        | 1.70           | 1.26x10 <sup>-3</sup> | 1.95           | 2.81x10 <sup>-5</sup> | 0.46           | 5.48x10 <sup>-4</sup> | 4.13x10 <sup>-5</sup> | 4.13x10 <sup>-5</sup> | BZRAP1         | NA          | 0    |      |                |      |                |      |                |      |                |                |      |                |
| rs12981067 | 19  | 0.50        | 1.27           | 6.42x10 <sup>-3</sup> | 1.45           | 3.00x10 <sup>-5</sup> | 0.65           | 2.99x10 <sup>-3</sup> | 1.05x10 <sup>-4</sup> | 1.05x10 <sup>-4</sup> | PPAP2C         | rs12981067  | 1    | 0.46 | 1.03           | 0.74 | 1.10           | 1.10 | 0.21           | 0.86 | 0.22           | 0.86           | 0.22 |                |
| rs2850343  | 4   | 0.10        | 0.68           | 9.14x10 <sup>-4</sup> | 0.61           | 3.04x10 <sup>-5</sup> | 1.91           | 3.53x10 <sup>-4</sup> | 5.54x10 <sup>-5</sup> | 5.54x10 <sup>-5</sup> | PP3CA          | NA          | 0    |      |                |      |                |      |                |      |                |                |      |                |
| rs9894139  | 17  | 0.39        | 1.29           | 2.87x10 <sup>-3</sup> | 1.43           | 3.12x10 <sup>-5</sup> | 0.62           | 3.96x10 <sup>-4</sup> | 1.03x10 <sup>-4</sup> | 1.03x10 <sup>-4</sup> | RPFOX3         | rs9894139   | 1    | 0.39 | 0.87           | 0.07 | 0.91           | 0.91 | 0.25           | 1.28 | 0.05           | 1.28           | 0.05 |                |
| rs2462167  | 11  | 0.50        | 1.31           | 1.63x10 <sup>-3</sup> | 1.43           | 3.49x10 <sup>-5</sup> | 0.66           | 3.38x10 <sup>-3</sup> | 1.05x10 <sup>-4</sup> | 1.05x10 <sup>-4</sup> | NA             | rs1403947   | 1    | 0.49 | 1.02           | 0.84 | 0.98           | 0.98 | 0.80           | 0.96 | 0.73           | 0.96           | 0.73 |                |
| rs2161655  | 16  | 0.16        | 0.84           | 7.76x10 <sup>-2</sup> | 0.65           | 3.77x10 <sup>-5</sup> | 1.70           | 7.80x10 <sup>-4</sup> | 7.24x10 <sup>-5</sup> | 7.24x10 <sup>-5</sup> | NA             | rs2161655   | 1    | 0.17 | 0.86           | 0.11 | 0.90           | 0.90 | 0.25           | 1.21 | 0.16           | 1.21           | 0.16 |                |
| rs12258303 | 10  | 0.08        | 1.47           | 1.12x10 <sup>-2</sup> | 1.81           | 4.29x10 <sup>-5</sup> | 0.48           | 5.98x10 <sup>-4</sup> | 4.59x10 <sup>-5</sup> | 4.59x10 <sup>-5</sup> | RP11-556E13.1  | rs16932605  | 0.91 | 0.09 | 1.37           | 0.01 | 1.12           | 1.12 | 0.34           | 0.67 | 0.02           | 0.67           | 0.02 |                |
| rs6677933  | 1   | 0.19        | 0.73           | 1.57x10 <sup>-3</sup> | 0.67           | 4.49x10 <sup>-5</sup> | 1.77           | 2.08x10 <sup>-4</sup> | 8.11x10 <sup>-5</sup> | 8.11x10 <sup>-5</sup> | LINC01160      | rs6677933   | 1    | 0.21 | 1.04           | 0.65 | 1.04           | 1.04 | 0.69           | 1.01 | 0.93           | 1.01           | 0.93 |                |
| rs7431430  | 3   | 0.30        | 1.28           | 7.80x10 <sup>-3</sup> | 1.45           | 5.06x10 <sup>-5</sup> | 0.56           | 6.41x10 <sup>-5</sup> | 9.69x10 <sup>-5</sup> | 9.69x10 <sup>-5</sup> | NA             | rs7431430   | 1    | 0.29 | 0.93           | 0.39 | 0.94           | 0.94 | 0.43           | 1.01 | 0.96           | 1.01           | 0.96 |                |
| rs34978    | 5   | 0.43        | 1.42           | 7.67x10 <sup>-5</sup> | 1.43           | 5.72x10 <sup>-5</sup> | 0.58           | 1.87x10 <sup>-4</sup> | 1.04x10 <sup>-4</sup> | 1.04x10 <sup>-4</sup> | MLN            | rs1734262   | 0.81 | 0.50 | 1.05           | 0.50 | 1.02           | 1.02 | 0.77           | 0.82 | 0.10           | 0.82           | 0.10 |                |
| rs6868044  | 5   | 0.30        | 1.38           | 4.29x10 <sup>-4</sup> | 1.44           | 5.90x10 <sup>-5</sup> | 0.54           | 2.04x10 <sup>-5</sup> | 9.68x10 <sup>-5</sup> | 9.68x10 <sup>-5</sup> | GALNT10        | rs6868044   | 1    | 0.30 | 0.97           | 0.69 | 1.08           | 1.08 | 0.34           | 1.00 | 0.98           | 1.00           | 0.98 |                |
| rs2277537  | 15  | 0.41        | 1.32           | 2.34x10 <sup>-3</sup> | 1.43           | 6.11x10 <sup>-5</sup> | 0.61           | 8.41x10 <sup>-4</sup> | 1.04x10 <sup>-4</sup> | 1.04x10 <sup>-4</sup> | TYRO3          | rs2277537   | 1    | 0.43 | 1.00           | 0.96 | 1.00           | 1.00 | 0.97           | 1.11 | 0.43           | 1.11           | 0.43 |                |
| rs1983635  | 6   | 0.31        | 1.24           | 2.08x10 <sup>-2</sup> | 1.46           | 6.18x10 <sup>-5</sup> | 0.67           | 5.89x10 <sup>-3</sup> | 9.79x10 <sup>-5</sup> | 9.79x10 <sup>-5</sup> | GRM1           | rs1983635   | 1    | 0.28 | 0.85           | 0.05 | 0.82           | 0.82 | 0.02           | 1.23 | 0.12           | 1.23           | 0.12 |                |
| rs17129021 | 14  | 0.29        | 0.79           | 7.95x10 <sup>-3</sup> | 0.70           | 6.30x10 <sup>-5</sup> | 1.69           | 2.12x10 <sup>-4</sup> | 9.52x10 <sup>-5</sup> | 9.52x10 <sup>-5</sup> | UNC79          | rs6575325   | 0.89 | 0.29 | 1.07           | 0.38 | 0.97           | 0.97 | 0.68           | 0.96 | 0.75           | 0.96           | 0.75 |                |
| rs8025806  | 15  | 0.31        | 1.48           | 7.37x10 <sup>-6</sup> | 1.42           | 6.40x10 <sup>-5</sup> | 0.57           | 4.37x10 <sup>-5</sup> | 9.80x10 <sup>-5</sup> | 9.80x10 <sup>-5</sup> | PCAT29         | rs8025806   | 1    | 0.30 | 1.10           | 0.24 | 1.07           | 1.07 | 0.42           | 0.94 | 0.63           | 0.94           | 0.63 |                |
| rs1476652  | 7   | 0.39        | 0.85           | 6.47x10 <sup>-2</sup> | 0.71           | 6.61x10 <sup>-5</sup> | 1.80           | 2.61x10 <sup>-5</sup> | 1.03x10 <sup>-4</sup> | 1.03x10 <sup>-4</sup> | COL26A1        | NA          | 0    |      |                |      |                |      |                |      |                |                |      |                |
| rs714650   | 8   | 0.44        | 0.84           | 4.15x10 <sup>-2</sup> | 0.71           | 6.76x10 <sup>-5</sup> | 1.32           | 4.17x10 <sup>-2</sup> | 1.05x10 <sup>-4</sup> | 1.05x10 <sup>-4</sup> | RP11-134O21.1  | NA          | 0    |      |                |      |                |      |                |      |                |                |      |                |
| rs12594729 | 15  | 0.48        | 1.28           | 4.40x10 <sup>-3</sup> | 1.42           | 6.97x10 <sup>-5</sup> | 0.56           | 4.69x10 <sup>-5</sup> | 1.05x10 <sup>-4</sup> | 1.05x10 <sup>-4</sup> | NA             | NA          | 0    |      |                |      |                |      |                |      |                |                |      |                |
| rs1036815  | 18  | 0.20        | 0.89           | 2.31x10 <sup>-1</sup> | 0.67           | 7.16x10 <sup>-5</sup> | 1.46           | 1.44x10 <sup>-2</sup> | 8.21x10 <sup>-5</sup> | 8.21x10 <sup>-5</sup> | SMCHD1         | rs8092725   | 0.86 | 0.23 | 0.99           | 0.88 | 1.01           | 1.01 | 0.95           | 1.06 | 0.65           | 1.06           | 0.65 |                |
| rs12600284 | 16  | 0.23        | 1.36           | 2.00x10 <sup>-3</sup> | 1.47           | 1.18x10 <sup>-5</sup> | 0.61           | 1.03x10 <sup>-3</sup> | 8.87x10 <sup>-5</sup> | 8.87x10 <sup>-5</sup> | RBFOX1         | rs12600284  | 1    | 0.22 | 0.94           | 0.45 | 0.98           | 0.98 | 0.82           | 1.07 | 0.61           | 1.07           | 0.61 |                |
| rs11163185 | 1   | 0.42        | 0.82           | 2.23x10 <sup>-2</sup> | 0.71           | 7.52x10 <sup>-5</sup> | 1.52           | 2.28x10 <sup>-3</sup> | 1.04x10 <sup>-4</sup> | 1.04x10 <sup>-4</sup> | SLC44A5        | NA          | 0    |      |                |      |                |      |                |      |                |                |      |                |
| rs13120537 | 4   | 0.27        | 0.77           | 3.58x10 <sup>-3</sup> | 0.70           | 8.02x10 <sup>-5</sup> | 1.55           | 2.33x10 <sup>-3</sup> | 9.37x10 <sup>-5</sup> | 9.37x10 <sup>-5</sup> | ARAP2          | NA          | 0    |      |                |      |                |      |                |      |                |                |      |                |
| rs1048126  | 1   | 0.31        | 0.71           | 1.78x10 <sup>-4</sup> | 0.70           | 8.22x10 <sup>-5</sup> | 1.82           | 3.45x10 <sup>-5</sup> | 9.77x10 <sup>-5</sup> | 9.77x10 <sup>-5</sup> | GPATC2         | rs1048126   | 1    | 0.32 | 0.94           | 0.49 | 0.92           | 0.92 | 0.33           | 1.12 | 0.39           | 1.12           | 0.39 |                |
| rs4711453  | 6   | 0.28        | 0.80           | 1.26x10 <sup>-2</sup> | 0.69           | 8.38x10 <sup>-5</sup> | 1.69           | 3.93x10 <sup>-4</sup> | 9.44x10 <sup>-5</sup> | 9.44x10 <sup>-5</sup> | KCTD20         | rs4711453   | 1    | 0.32 | 1.14           | 0.11 | 1.05           | 1.   |                |      |                |                |      |                |

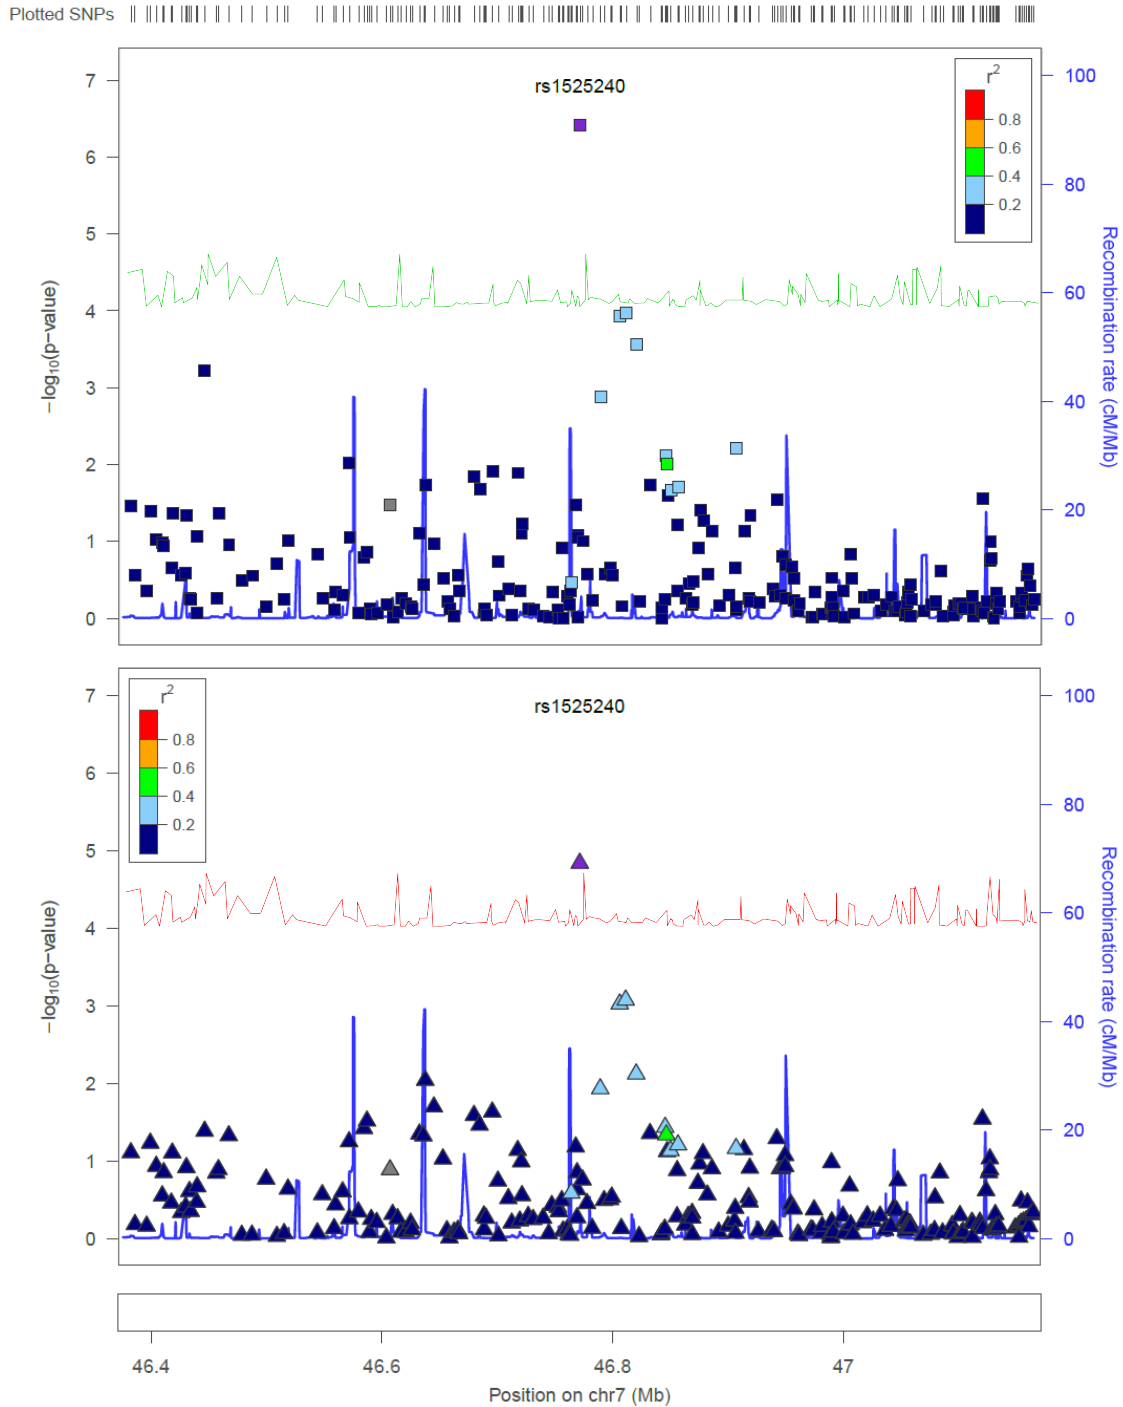

**Figure S11: AGP Strict Chromosome 7, rs1525240 Paternal Over-Transmission and Maternal Effect.** The top panel shows the regional plot of SNPs highlighted in the AGP Strict analysis for an imprinting effect ( $I_M$ , squares) when there is an association above the  $R_1$  threshold (green line). The second panel shows the regional plot for maternal genetic effects ( $S_1$ , triangles) and the  $S_1$  threshold (green line). Index SNP rs1525240 is shown in purple. Markers in linkage disequilibrium with the index SNP are shown and based on 1000 genomes CEU. Recombination rate plotted in blue.

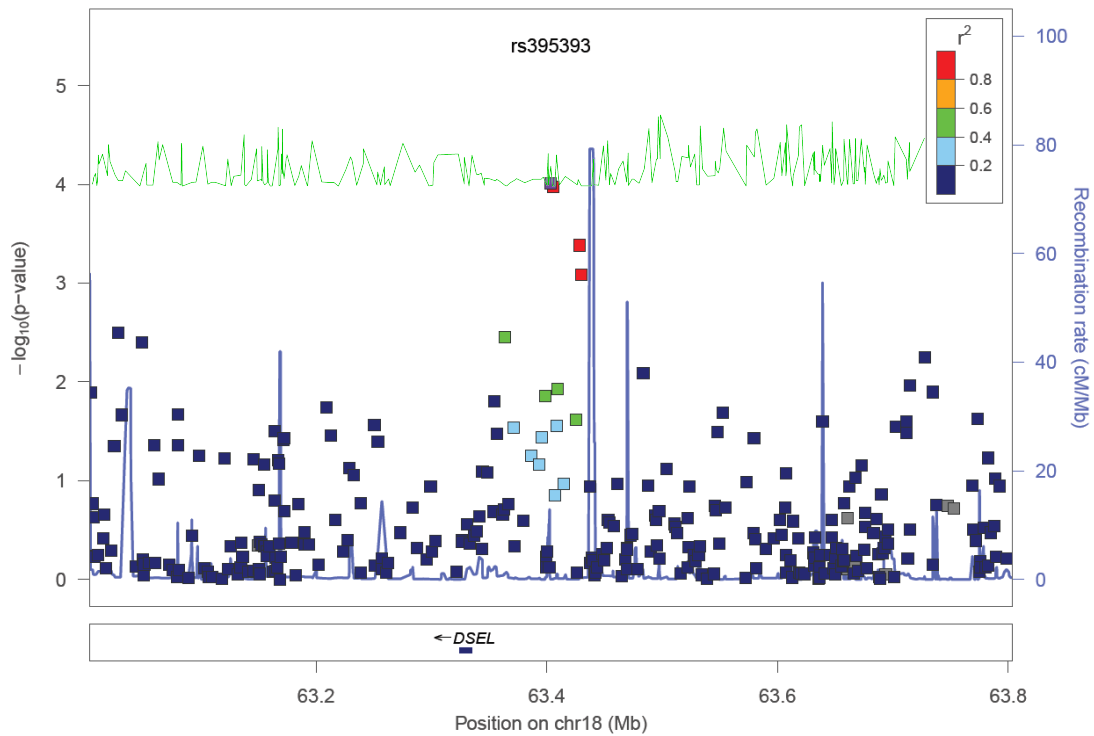

**Figure S12: AGP Strict Chromosome 18, rs395393 Maternal Over-Transmission.** The top panel shows the regional plot of SNPs highlighted in the AGP Strict analysis for the association ( $R_1$ , circles). When the association is above the Bayesian threshold for  $R_1$  (green line), we then investigate the imprinting results, shown in the second panel represented by squares. Index SNP rs395393 is shown in purple. Markers in linkage disequilibrium with the index SNP are shown and based on 1000 genomes CEU. Recombination rate plotted in blue.



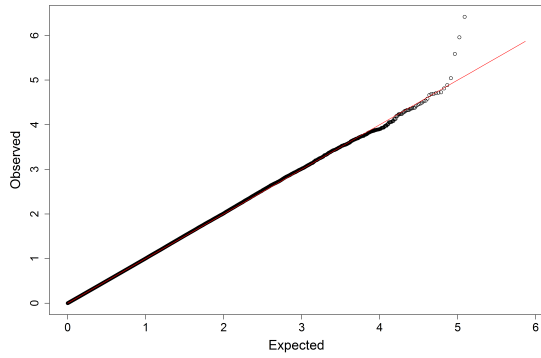

(a)  $I_M$

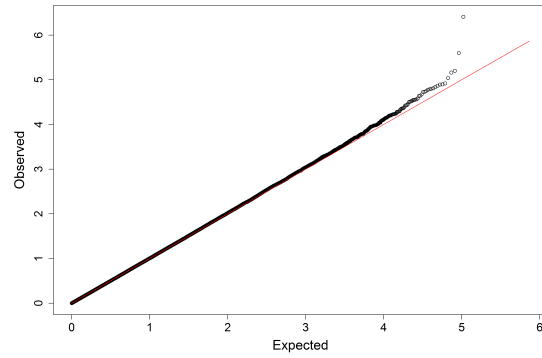

(b)  $S_1$

Figure S14: QQ plots for AGP Strict dataset

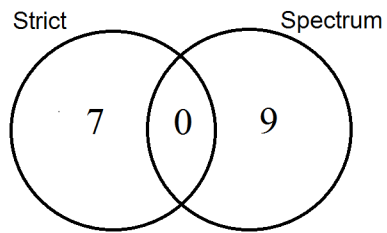

(a)  $I_M$

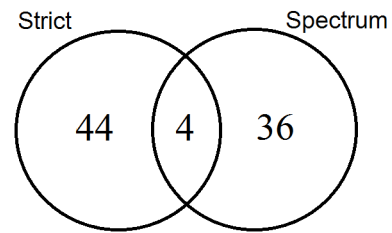

(b)  $S_1$

Figure S15: Summary of AGP results, for imprinting,  $I_M$ , and maternal genetic effects,  $S_1$ , and the overlap between Strict and Spectrum datasets



# SSC Spectrum Results

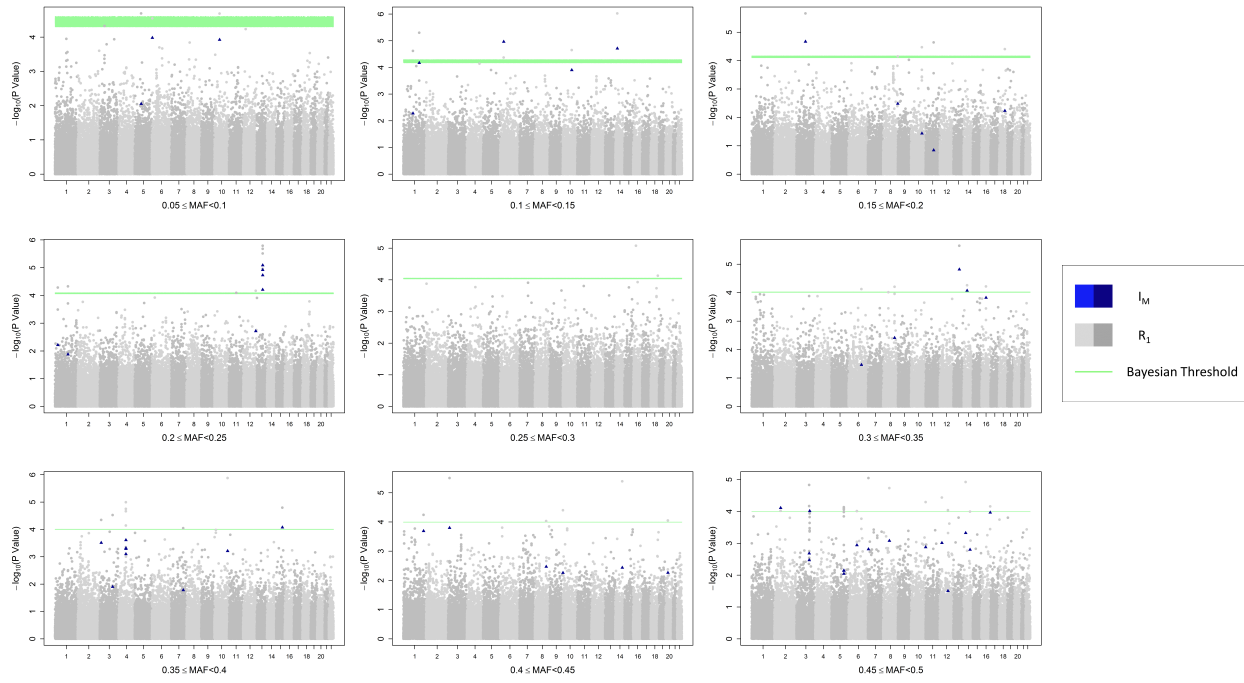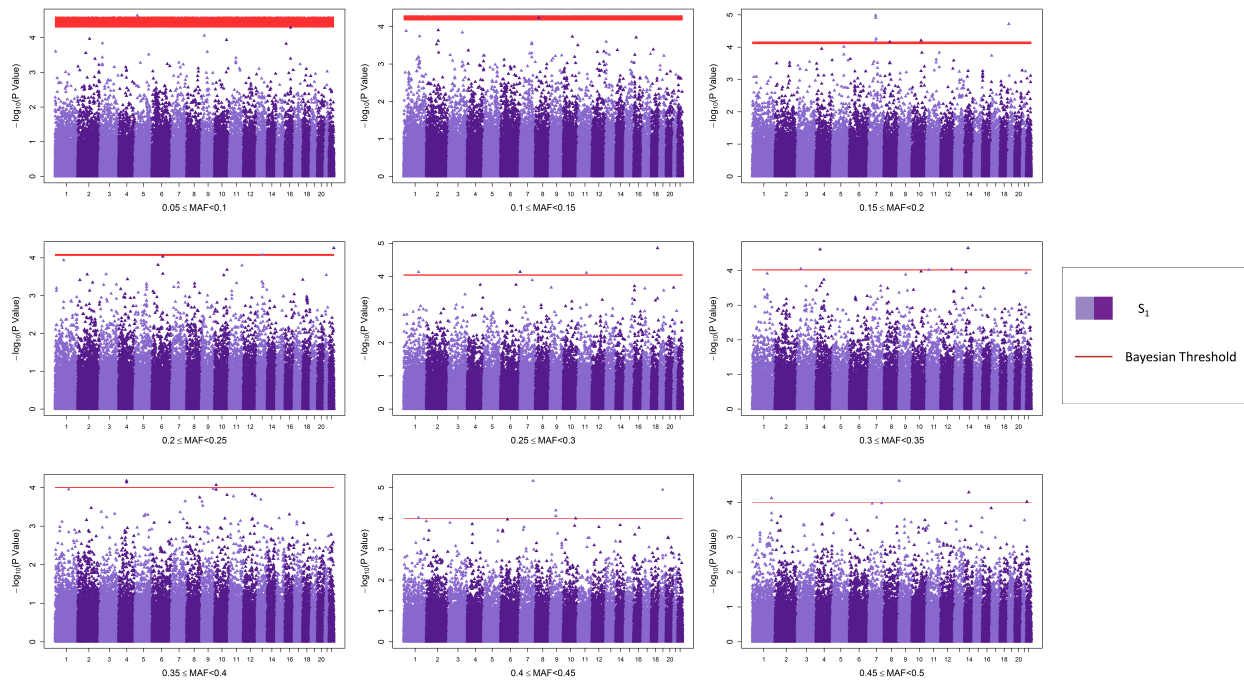

Figure S16: Manhattan Plots for Imprinting (Figure S16 (a)) and Maternal Genetic Effects (Figure S16 (b)) for Spectrum Phenotype in SSC dataset

**Table S8: Top Imprinting Results in the SSC Spectrum dataset and the corresponding findings in the AGP Spectrum dataset**

| SNP        | Chr | MAF  | $R_1$ | PV $R_1$              | SSC Results |                       |        |                       | Gene                  | $R_1$ Threshold      | AGP Results |      |       |          |       |          |       |          |
|------------|-----|------|-------|-----------------------|-------------|-----------------------|--------|-----------------------|-----------------------|----------------------|-------------|------|-------|----------|-------|----------|-------|----------|
|            |     |      |       |                       | $S_1$       | PV $S_1$              | $I_M$  | PV $I_M$              |                       |                      | $R_1$       | MAF  | $R_1$ | PV $R_1$ | $S_1$ | PV $S_1$ | $I_M$ | PV $I_M$ |
| rs9573533  | 13  | 0.23 | 1.43  | $3.08 \times 10^{-6}$ | 1.25        | $4.84 \times 10^{-3}$ | $0.59$ | $8.17 \times 10^{-6}$ | $8.49 \times 10^{-5}$ | <i>TBC1D4</i>        | 1           | 0.23 | 1.04  | 0.59     | 0.88  | 0.08     | 0.98  | 0.83     |
| rs16890706 | 6   | 0.12 | 0.68  | $4.26 \times 10^{-5}$ | 0.77        | $4.31 \times 10^{-3}$ | 1.86   | $1.09 \times 10^{-5}$ | $5.82 \times 10^{-5}$ | <i>LRRRC16A</i>      | 1           | 0.13 | 0.96  | 0.64     | 0.93  | 0.38     | 1.18  | 0.21     |
| rs8013309  | 14  | 0.13 | 0.63  | $9.47 \times 10^{-7}$ | 0.77        | $3.73 \times 10^{-3}$ | 1.81   | $1.95 \times 10^{-5}$ | $6.16 \times 10^{-5}$ | NA                   | 1           | 0.13 | 1.07  | 0.45     | 0.95  | 0.59     | 0.97  | 0.82     |
| rs7651342  | 3   | 0.16 | 1.51  | $2.17 \times 10^{-6}$ | 1.37        | $5.08 \times 10^{-4}$ | 0.57   | $2.14 \times 10^{-5}$ | $7.11 \times 10^{-5}$ | <i>RP11-260018.1</i> | 1           | 0.14 | 0.96  | 0.60     | 0.97  | 0.77     | 1.15  | 0.29     |
| rs16860429 | 1   | 0.12 | 1.59  | $5.01 \times 10^{-6}$ | 1.46        | $1.80 \times 10^{-4}$ | 0.56   | $6.75 \times 10^{-5}$ | $6.75 \times 10^{-5}$ | NA                   | 1           | 0.11 | 1.22  | 0.04     | 1.22  | 0.04     | 0.75  | 0.05     |
| rs165052   | 2   | 0.46 | 1.32  | $9.57 \times 10^{-5}$ | 1.18        | $2.05 \times 10^{-2}$ | 0.63   | $7.75 \times 10^{-5}$ | $1.02 \times 10^{-4}$ | <i>EML6</i>          | 1           | 0.46 | 1.05  | 0.49     | 1.02  | 0.74     | 0.98  | 0.88     |
| rs2136980  | 15  | 0.40 | 0.74  | $1.61 \times 10^{-5}$ | 0.83        | $7.76 \times 10^{-3}$ | 1.56   | $8.42 \times 10^{-5}$ | $1.00 \times 10^{-4}$ | NA                   | 1           | 0.40 | 1.04  | 0.58     | 1.01  | 0.84     | 1.08  | 0.50     |
| rs17124893 | 14  | 0.33 | 1.34  | $5.48 \times 10^{-5}$ | 1.36        | $2.25 \times 10^{-5}$ | 0.64   | $8.48 \times 10^{-5}$ | $9.64 \times 10^{-5}$ | <i>NID2</i>          | 1           | 0.32 | 0.98  | 0.77     | 1.03  | 0.65     | 0.98  | 0.84     |
| rs9647337  | 3   | 0.45 | 1.31  | $1.01 \times 10^{-4}$ | 1.19        | $1.37 \times 10^{-2}$ | 0.64   | $9.68 \times 10^{-5}$ | $1.02 \times 10^{-4}$ | <i>PIK3CB</i>        | 1           | 0.46 | 0.96  | 0.52     | 1.02  | 0.73     | 0.92  | 0.46     |

$R_1$  denotes the relative risk for the offspring having one copy of the variant allele,  $S_1$  denotes the relative risk for the mother having one copy of the variant allele,  $I_M$  denotes the relative risk for a maternal over-transmission of the allele, and  $PV$  denotes p-value.

**Table S9: Maternal Genetic Effects Results in the SSC Spectrum dataset and the corresponding findings in the AGP Spectrum dataset**

| SSC Results |     |      |       |                       |       |                       |       |                       |                       |                  | AGP Results |       |      |       |           |       |           |       |           |
|-------------|-----|------|-------|-----------------------|-------|-----------------------|-------|-----------------------|-----------------------|------------------|-------------|-------|------|-------|-----------|-------|-----------|-------|-----------|
| SNP         | Chr | MAF  | $R_1$ | $PV\ R_1$             | $S_1$ | $PV\ S_1$             | $I_M$ | $PV\ I_M$             | $S_1$ Threshold       | Gene             | SNP         | $R^2$ | MAF  | $R_1$ | $PV\ R_1$ | $S_1$ | $PV\ S_1$ | $I_M$ | $PV\ I_M$ |
| rs6967953   | 7   | 0.41 | 1.19  | $1.67 \times 10^{-2}$ | 1.38  | $6.01 \times 10^{-6}$ | 0.61  | $3.31 \times 10^{-5}$ | $1.01 \times 10^{-4}$ | <i>CHRM2</i>     | rs6967953   | 1     | 0.41 | 0.97  | 0.65      | 0.92  | 0.20      | 1.13  | 0.26      |
| rs10499761  | 7   | 0.18 | 1.36  | $2.80 \times 10^{-4}$ | 1.44  | $1.05 \times 10^{-5}$ | 0.61  | $7.60 \times 10^{-5}$ | $7.51 \times 10^{-5}$ | NA               | rs10499761  | 1     | 0.17 | 1.07  | 0.43      | 1.08  | 0.31      | 0.94  | 0.60      |
| rs10415705  | 19  | 0.42 | 0.89  | $1.15 \times 10^{-1}$ | 0.73  | $1.16 \times 10^{-5}$ | 1.37  | $5.99 \times 10^{-3}$ | $1.01 \times 10^{-4}$ | NA               | rs10415705  | 1     | 0.42 | 1.02  | 0.81      | 1.02  | 0.82      | 1.00  | 0.99      |
| rs9953010   | 18  | 0.28 | 1.15  | $6.66 \times 10^{-2}$ | 1.38  | $1.40 \times 10^{-5}$ | 0.66  | $4.86 \times 10^{-4}$ | $9.18 \times 10^{-5}$ | NA               | rs9953010   | 1     | 0.29 | 0.98  | 0.77      | 1.01  | 0.88      | 1.04  | 0.75      |
| rs10424718  | 19  | 0.16 | 0.73  | $1.98 \times 10^{-4}$ | 0.70  | $1.92 \times 10^{-5}$ | 1.55  | $7.98 \times 10^{-4}$ | $7.02 \times 10^{-5}$ | <i>CELF5</i>     | rs10424718  | 1     | 0.15 | 1.05  | 0.56      | 0.96  | 0.68      | 1.05  | 0.72      |
| rs17124893  | 14  | 0.33 | 1.34  | $5.48 \times 10^{-5}$ | 1.36  | $2.25 \times 10^{-5}$ | 0.64  | $8.48 \times 10^{-5}$ | $9.64 \times 10^{-5}$ | <i>NID2</i>      | rs17124893  | 1     | 0.32 | 0.98  | 0.77      | 1.03  | 0.65      | 0.98  | 0.84      |
| rs10042810  | 5   | 0.07 | 1.16  | $2.56 \times 10^{-1}$ | 1.67  | $2.29 \times 10^{-5}$ | 0.63  | $1.11 \times 10^{-2}$ | $3.34 \times 10^{-5}$ | NA               | rs10042810  | 1     | 0.06 | 0.83  | 0.10      | 0.80  | 0.05      | 1.24  | 0.20      |
| rs1339359   | 9   | 0.50 | 1.25  | $1.31 \times 10^{-3}$ | 1.35  | $2.39 \times 10^{-5}$ | 0.72  | $4.51 \times 10^{-3}$ | $1.02 \times 10^{-4}$ | NA               | rs1339359   | 1     | 0.50 | 0.99  | 0.93      | 1.04  | 0.53      | 0.97  | 0.81      |
| rs4861106   | 4   | 0.32 | 0.85  | $2.66 \times 10^{-2}$ | 0.74  | $2.44 \times 10^{-5}$ | 1.39  | $4.08 \times 10^{-3}$ | $9.56 \times 10^{-5}$ | NA               | rs4861106   | 1     | 0.30 | 1.10  | 0.18      | 1.03  | 0.70      | 0.86  | 0.19      |
| rs8016570   | 14  | 0.46 | 1.17  | $2.94 \times 10^{-2}$ | 1.34  | $5.11 \times 10^{-5}$ | 0.77  | $2.81 \times 10^{-2}$ | $1.02 \times 10^{-4}$ | <i>DAAMI</i>     | rs8016570   | 1     | 0.46 | 1.12  | 0.11      | 1.06  | 0.38      | 0.83  | 0.10      |
| rs610529    | 9   | 0.44 | 1.21  | $6.74 \times 10^{-3}$ | 1.32  | $5.46 \times 10^{-5}$ | 0.68  | $6.49 \times 10^{-4}$ | $1.01 \times 10^{-4}$ | <i>ALDH1A1</i>   | rs610529    | 1     | 0.44 | 1.14  | 0.05      | 1.01  | 0.93      | 0.93  | 0.48      |
| rs4719103   | 7   | 0.16 | 1.23  | $2.08 \times 10^{-2}$ | 1.41  | $5.48 \times 10^{-5}$ | 0.61  | $1.79 \times 10^{-4}$ | $6.98 \times 10^{-5}$ | <i>WBSR17</i>    | rs4719103   | 1     | 0.15 | 1.02  | 0.84      | 0.96  | 0.63      | 0.93  | 0.60      |
| rs5770820   | 22  | 0.21 | 1.25  | $5.74 \times 10^{-3}$ | 1.38  | $5.54 \times 10^{-5}$ | 0.64  | $3.82 \times 10^{-4}$ | $8.16 \times 10^{-5}$ | <i>SHANK3</i>    | rs5770820   | 1     | 0.21 | 0.83  | 0.02      | 0.98  | 0.82      | 1.24  | 0.08      |
| rs12676446  | 8   | 0.12 | 1.20  | $7.67 \times 10^{-2}$ | 1.47  | $5.84 \times 10^{-5}$ | 0.77  | $7.28 \times 10^{-2}$ | $5.88 \times 10^{-5}$ | <i>PSD3</i>      | rs12676446  | 1     | 0.11 | 0.98  | 0.86      | 1.03  | 0.74      | 0.96  | 0.78      |
| rs11201909  | 10  | 0.16 | 0.88  | $1.11 \times 10^{-1}$ | 0.71  | $6.18 \times 10^{-5}$ | 1.30  | $4.49 \times 10^{-2}$ | $7.14 \times 10^{-5}$ | <i>GRID1</i>     | rs11201909  | 1     | 0.15 | 1.04  | 0.62      | 0.98  | 0.80      | 0.94  | 0.62      |
| rs10021524  | 4   | 0.39 | 1.18  | $2.45 \times 10^{-2}$ | 1.33  | $6.63 \times 10^{-5}$ | 0.74  | $9.21 \times 10^{-3}$ | $9.99 \times 10^{-5}$ | <i>CCSER1</i>    | rs10021524  | 1     | 0.39 | 1.04  | 0.54      | 1.05  | 0.51      | 0.90  | 0.34      |
| rs12549180  | 8   | 0.19 | 1.33  | $6.92 \times 10^{-4}$ | 1.40  | $6.87 \times 10^{-5}$ | 0.69  | $2.53 \times 10^{-3}$ | $7.74 \times 10^{-5}$ | NA               | rs12549180  | 1     | 0.18 | 1.07  | 0.39      | 1.00  | 0.95      | 0.89  | 0.36      |
| rs1000104   | 6   | 0.29 | 1.20  | $1.55 \times 10^{-2}$ | 1.34  | $7.27 \times 10^{-5}$ | 0.72  | $4.15 \times 10^{-3}$ | $9.24 \times 10^{-5}$ | NA               | rs1000104   | 1     | 0.27 | 0.94  | 0.43      | 0.96  | 0.60      | 1.12  | 0.32      |
| rs7515001   | 1   | 0.29 | 0.79  | $1.41 \times 10^{-3}$ | 0.74  | $7.34 \times 10^{-5}$ | 1.46  | $1.42 \times 10^{-3}$ | $9.22 \times 10^{-5}$ | <i>GM2AP2</i>    | rs7515001   | 1     | 0.28 | 1.01  | 0.93      | 1.03  | 0.69      | 0.95  | 0.67      |
| rs1995873   | 1   | 0.47 | 0.80  | $1.86 \times 10^{-3}$ | 0.76  | $7.51 \times 10^{-5}$ | 1.57  | $9.66 \times 10^{-5}$ | $1.02 \times 10^{-4}$ | <i>LINC00210</i> | rs1995873   | 1     | 0.48 | 1.13  | 0.07      | 1.06  | 0.35      | 0.88  | 0.26      |
| rs2173281   | 11  | 0.28 | 1.23  | $5.99 \times 10^{-3}$ | 1.34  | $7.72 \times 10^{-5}$ | 0.65  | $1.80 \times 10^{-4}$ | $9.19 \times 10^{-5}$ | NA               | rs2173281   | 1     | 0.30 | 0.97  | 0.68      | 0.98  | 0.73      | 1.05  | 0.65      |
| rs11256031  | 10  | 0.36 | 1.33  | $1.04 \times 10^{-4}$ | 1.33  | $8.45 \times 10^{-5}$ | 0.66  | $4.13 \times 10^{-4}$ | $9.83 \times 10^{-5}$ | NA               | rs11256031  | 1     | 0.35 | 0.98  | 0.78      | 1.01  | 0.90      | 1.02  | 0.83      |
| rs4973800   | 3   | 0.34 | 0.82  | $7.04 \times 10^{-3}$ | 0.75  | $8.81 \times 10^{-5}$ | 1.58  | $9.62 \times 10^{-5}$ | $9.68 \times 10^{-5}$ | <i>LRRC3B</i>    | rs4973800   | 1     | 0.34 | 1.12  | 0.10      | 1.06  | 0.41      | 0.86  | 0.15      |
| rs933296    | 12  | 0.31 | 0.87  | $4.68 \times 10^{-2}$ | 0.75  | $9.21 \times 10^{-5}$ | 1.30  | $2.79 \times 10^{-2}$ | $9.48 \times 10^{-5}$ | <i>MYL2</i>      | rs933296    | 1     | 0.32 | 1.03  | 0.72      | 1.03  | 0.69      | 0.90  | 0.37      |
| rs2207189   | 1   | 0.40 | 1.20  | $1.08 \times 10^{-2}$ | 1.33  | $9.45 \times 10^{-5}$ | 0.71  | $3.10 \times 10^{-3}$ | $1.00 \times 10^{-4}$ | <i>RNU6-290P</i> | rs2207189   | 1     | 0.40 | 0.90  | 0.14      | 0.94  | 0.36      | 1.12  | 0.31      |
| rs11704083  | 22  | 0.49 | 0.87  | $5.59 \times 10^{-2}$ | 0.76  | $9.52 \times 10^{-5}$ | 1.40  | $3.33 \times 10^{-3}$ | $1.02 \times 10^{-4}$ | <i>GNB1L</i>     | rs11704083  | 1     | 0.48 | 1.09  | 0.20      | 1.00  | 0.95      | 0.92  | 0.46      |
| rs1932543   | 10  | 0.43 | 1.19  | $1.59 \times 10^{-2}$ | 1.32  | $9.94 \times 10^{-5}$ | 0.71  | $3.24 \times 10^{-3}$ | $1.01 \times 10^{-4}$ | NA               | rs1932543   | 1     | 0.41 | 0.90  | 0.14      | 0.87  | 0.05      | 1.29  | 0.02      |

$R_1$  denotes the relative risk for the offspring having one copy of the variant allele,  $S_1$  denotes the relative risk for the mother having one copy of the variant allele,  $I_M$  denotes the relative risk for a maternal over-transmission of the allele, and  $PV$  denotes p-value.

Figure S17 gives the QQ plots for  $I_M$  and  $S_1$  in the SSC Spectrum dataset.

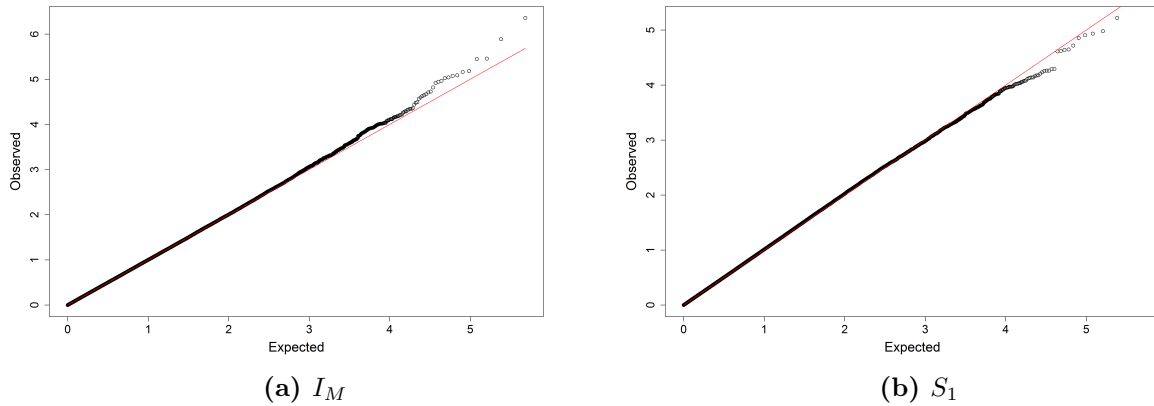

Figure S17: QQ plots for SSC Spectrum dataset

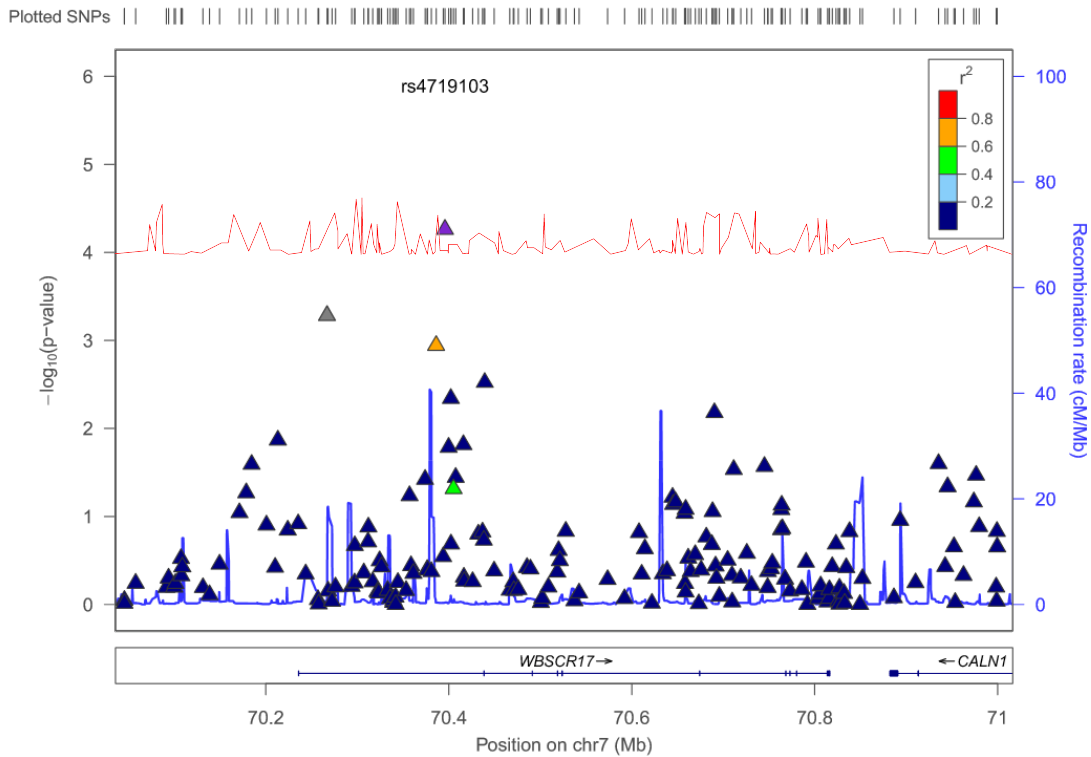

**Figure S18: SSC Spectrum Chromosome 7, rs4719103 Maternal Genetic Effect.** Regional plot of SNPs highlighted in the SSC Spectrum analysis for maternal genetic effects ( $S_1$ , triangles). Index SNP rs4719103 is shown in purple. Markers in linkage disequilibrium with the index SNP are shown and based on 1000 genomes CEU. Recombination rate plotted in blue. The red line represents the Bayesian threshold for  $S_1$ .

## SSC Strict Results

There were three noteworthy imprinting results (one of which overlaps with the SSC Spectrum results) and there were twenty-four independent loci with a maternal genetic effect above the  $S_1$  threshold (six of which overlap with the SSC Strict results), see the Manhattan plots (Figure S19) and Tables S10 and S11. Figure S21 gives an the overlap of findings that where above the threshold in both the SSC Strict and SSC Spectrum. Note that many findings where above the threshold in one of the phenotypes and close but not above the threshold in the other phenotype and hence. were not noted as noteworthy findings. Figure S20 gives the QQ plots for  $I_M$  and  $S_1$  in the SSC Strict dataset.

## Imprinting Results

Our strongest associations showed evidence for maternal over-transmission on chromosome 14q13 within 10.7kb of the *NFKBIA* gene (rs8013309,  $I_M = 2$ , Wald p-value =  $8.08 \times 10^{-6}$ ). This area was previously linked with intellectual and developmental disabilities in a CNV study [26]. One of our top hits for maternal over-transmission on chromosome 6p is located in the *LRRC16A* gene (near the *HLA* region) (rs16890706,  $I_M = 1.94$ , Wald p-value =  $2.25 \times 10^{-5}$ ), which was previously implicated in language deficits in [27]. Another noteworthy maternal over-transmission result was found on chromosome 2 in the *DCDC2C* gene (rs357977,  $I_M = 1.707$ , Wald p-value =  $7.86 \times 10^{-5}$ ), which was previously implicated in low IQ in autism and other neurodevelopmental disorders [28].

## Maternal Genetic Results

We found evidence for a maternal genetic effect on chromosome 14q in the *DAAMI* gene (rs1253005,  $S_1 = 1.51$ , Wald p-value =  $3.84 \times 10^{-7}$ ). This area was previously implicated in a CNV study for intellectual and developmental disabilities [26]. One of our top hits for maternal genetic effects

is on chromosome 22 in the *SHANK3* gene (rs5770820,  $S_1 = 1.46$ , Wald p-value =  $2.45 \times 10^{-5}$ ), and disruptions in the *SHANK3* gene have been associated with autistic traits and in particular, these disruptions are responsible for the development of Phelan–McDermid syndrome and other non-syndromic ASDs [29]. A noteworthy protective maternal genetic effect result was identified on chromosome 16q21 in the *CDH8* gene (rs11075447,  $S_1 = 0.72$ , Wald p-value =  $5.94 \times 10^{-5}$ ), with evidence of disruptions in *CDH8* in two families being previously linked to autism and learning disability [30].

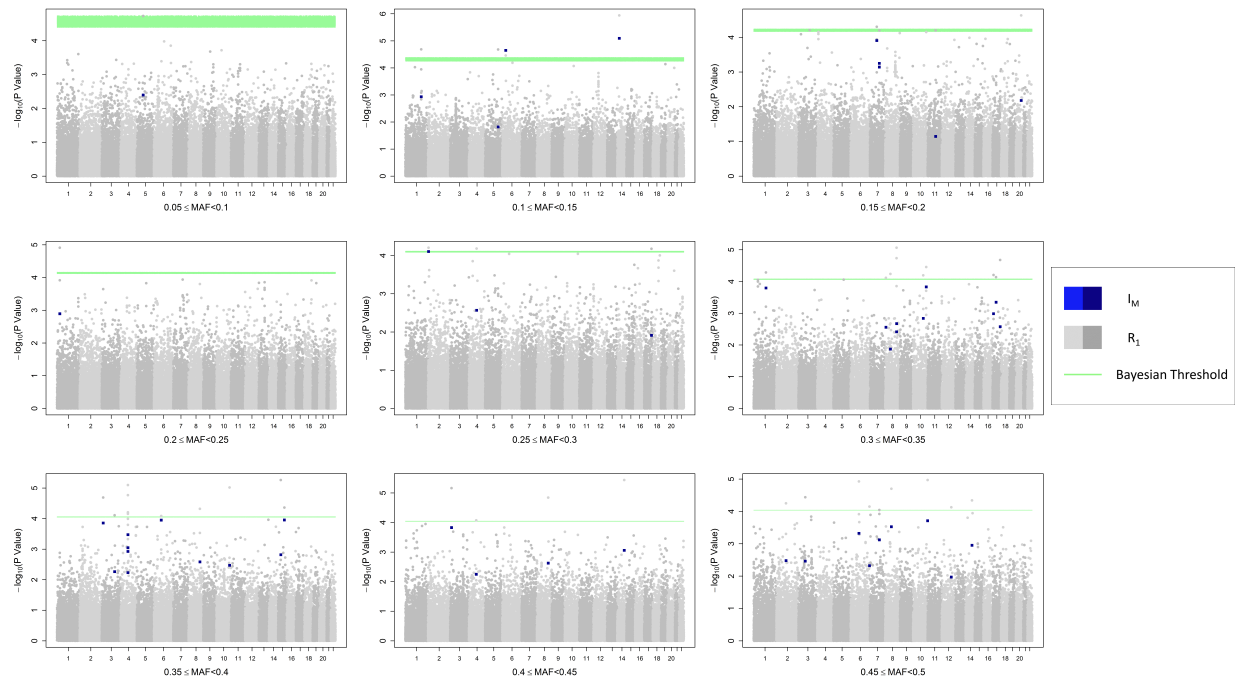

(a) Imprinting

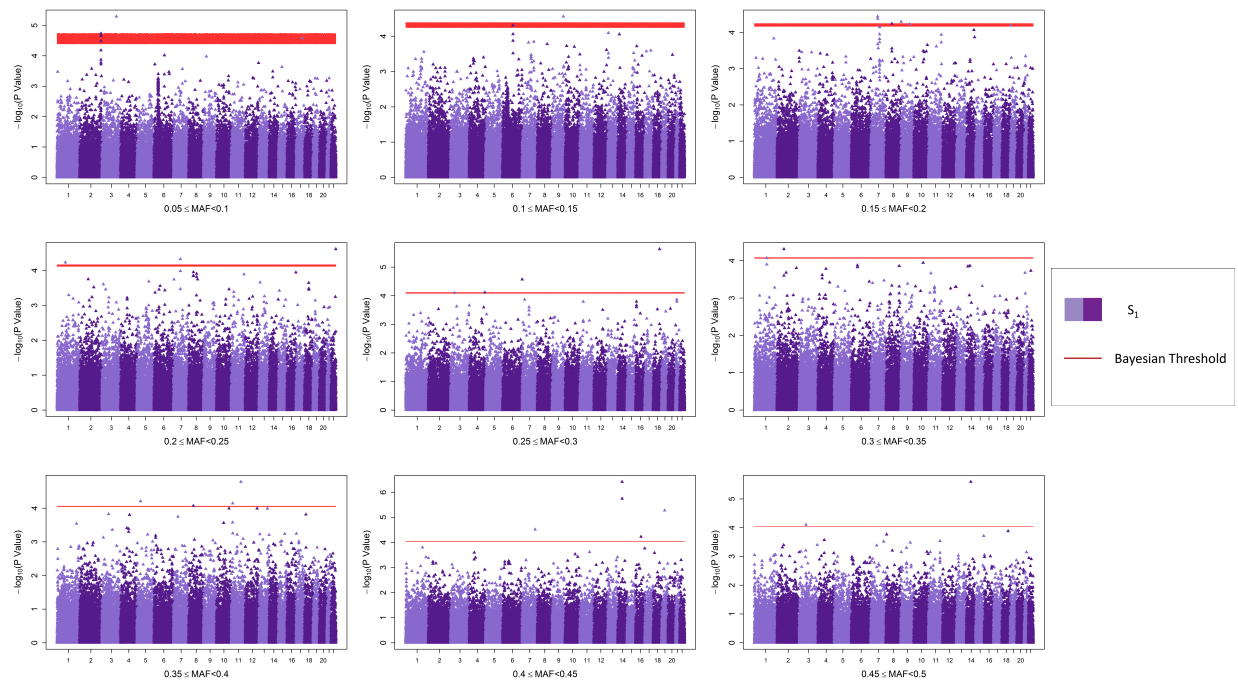

(b) Maternal Genetic Effects

**Figure S19: Manhattan Plots for Imprinting (Figure S19 (a)) and Maternal Genetic Effects (Figure S19 (b)) for Strict Phenotype in SSC dataset**

**Table S10: Top Imprinting Results in the SSC Strict dataset and the corresponding findings in the AGP Strict dataset**

| SSC Results |     |      |       |                       |       |                       |       |                       |                       | AGP Results     |            |       |      |       |          |       |          |       |          |
|-------------|-----|------|-------|-----------------------|-------|-----------------------|-------|-----------------------|-----------------------|-----------------|------------|-------|------|-------|----------|-------|----------|-------|----------|
| SNP         | Chr | MAF  | $R_1$ | $PV R_1$              | $S_1$ | $PV S_1$              | $I_M$ | $PV I_M$              | $R_1$ Threshold       | Gene            | SNP        | $R^2$ | MAF  | $R_1$ | $PV R_1$ | $S_1$ | $PV S_1$ | $I_M$ | $PV I_M$ |
| rs8013309   | 14  | 0.13 | 0.60  | $1.15 \times 10^{-6}$ | 0.72  | $7.79 \times 10^{-4}$ | 2.01  | $8.08 \times 10^{-6}$ | $5.01 \times 10^{-5}$ | NA              | rs8013309  | 1     | 0.13 | 1.04  | 0.72     | 0.90  | 0.39     | 1.11  | 0.55     |
| rs16890706  | 6   | 0.12 | 0.65  | $3.48 \times 10^{-5}$ | 0.74  | $3.52 \times 10^{-3}$ | 1.94  | $2.25 \times 10^{-5}$ | $4.87 \times 10^{-5}$ | <i>LRRCL16A</i> | rs16890706 | 1     | 0.13 | 0.87  | 0.19     | 0.86  | 0.18     | 1.30  | 0.11     |
| rs357977    | 2   | 0.28 | 0.71  | $6.26 \times 10^{-5}$ | 0.88  | $1.32 \times 10^{-1}$ | 1.71  | $7.86 \times 10^{-5}$ | $8.02 \times 10^{-5}$ | <i>DCDC2C</i>   | rs357977   | 1     | 0.28 | 0.86  | 0.09     | 0.95  | 0.57     | 1.18  | 0.25     |

$R_1$  denotes the relative risk for the offspring having one copy of the variant allele,  $S_1$  denotes the relative risk for the mother having one copy of the variant allele,  $I_M$  denotes the relative risk for a maternal over-transmission of the allele, and  $PV$  denotes p-value.

**Table S11: Maternal Genetic Effects Results in the SSC Strict dataset and the corresponding findings in the AGP Strict dataset**

| SSC Results |     |      |       |                       |       |                       |       |                       |                       | AGP Results         |            |       |      |       |          |       |          |       |          |
|-------------|-----|------|-------|-----------------------|-------|-----------------------|-------|-----------------------|-----------------------|---------------------|------------|-------|------|-------|----------|-------|----------|-------|----------|
| SNP         | Chr | MAF  | $R_1$ | $PV R_1$              | $S_1$ | $PV S_1$              | $I_M$ | $PV I_M$              | $S_1$ Threshold       | Gene                | SNP        | $R^2$ | MAF  | $R_1$ | $PV R_1$ | $S_1$ | $PV S_1$ | $I_M$ | $PV I_M$ |
| rs1253005   | 14  | 0.43 | 1.30  | $1.23 \times 10^{-3}$ | 1.51  | $3.84 \times 10^{-7}$ | 0.62  | $3.18 \times 10^{-4}$ | $9.05 \times 10^{-5}$ | <i>DAAMI</i>        | rs1253005  | 1     | 0.43 | 1.04  | 0.64     | 0.90  | 0.22     | 1.00  | 0.99     |
| rs9953010   | 18  | 0.27 | 1.23  | $1.76 \times 10^{-2}$ | 1.48  | $2.34 \times 10^{-6}$ | 0.59  | $9.86 \times 10^{-5}$ | $7.96 \times 10^{-5}$ | NA                  | rs9953010  | 1     | 0.28 | 0.91  | 0.30     | 1.07  | 0.49     | 1.01  | 0.93     |
| rs6440688   | 3   | 0.09 | 0.77  | $1.66 \times 10^{-2}$ | 0.58  | $5.09 \times 10^{-6}$ | 1.70  | $2.40 \times 10^{-3}$ | $3.86 \times 10^{-5}$ | <i>SELT</i>         | rs6440688  | 1     | 0.09 | 0.86  | 0.27     | 0.86  | 0.26     | 1.17  | 0.43     |
| rs10415705  | 19  | 0.42 | 0.88  | $1.09 \times 10^{-1}$ | 0.70  | $5.32 \times 10^{-6}$ | 1.43  | $5.13 \times 10^{-3}$ | $9.02 \times 10^{-5}$ | NA                  | rs10415705 | 1     | 0.42 | 1.01  | 0.94     | 1.04  | 0.64     | 0.98  | 0.90     |
| rs7939358   | 11  | 0.37 | 0.76  | $4.21 \times 10^{-4}$ | 0.71  | $1.63 \times 10^{-5}$ | 1.62  | $1.04 \times 10^{-4}$ | $8.76 \times 10^{-5}$ | NA                  | rs7939358  | 1     | 0.36 | 1.09  | 0.33     | 0.95  | 0.61     | 1.11  | 0.46     |
| rs12052787  | 2   | 0.07 | 1.57  | $1.59 \times 10^{-3}$ | 1.82  | $1.85 \times 10^{-5}$ | 0.53  | $9.46 \times 10^{-4}$ | $2.64 \times 10^{-5}$ | <i>UGT1A</i>        | rs12052787 | 1     | 0.06 | 0.86  | 0.32     | 1.06  | 0.69     | 1.14  | 0.56     |
| rs5770820   | 22  | 0.21 | 1.25  | $1.45 \times 10^{-2}$ | 1.46  | $2.45 \times 10^{-5}$ | 0.60  | $2.50 \times 10^{-4}$ | $6.99 \times 10^{-5}$ | <i>SHANK3</i>       | rs5770820  | 1     | 0.21 | 0.76  | 0.01     | 0.97  | 0.78     | 1.36  | 0.05     |
| rs1009962   | 17  | 0.09 | 0.69  | $1.10 \times 10^{-3}$ | 0.60  | $2.63 \times 10^{-5}$ | 2.05  | $4.70 \times 10^{-5}$ | $3.55 \times 10^{-5}$ | <i>TBX4</i>         | rs1009962  | 1     | 0.09 | 0.87  | 0.29     | 0.93  | 0.59     | 1.26  | 0.23     |
| rs1000104   | 6   | 0.29 | 1.23  | $1.33 \times 10^{-2}$ | 1.41  | $2.67 \times 10^{-5}$ | 0.66  | $1.74 \times 10^{-3}$ | $8.08 \times 10^{-5}$ | NA                  | rs1000104  | 1     | 0.28 | 0.98  | 0.86     | 1.05  | 0.57     | 1.03  | 0.86     |
| rs10306143  | 9   | 0.13 | 0.87  | $1.70 \times 10^{-1}$ | 0.64  | $2.75 \times 10^{-5}$ | 1.81  | $1.23 \times 10^{-4}$ | $4.96 \times 10^{-5}$ | <i>PTGSI</i>        | rs10306143 | 1     | 0.13 | 0.99  | 0.92     | 0.98  | 0.85     | 1.04  | 0.82     |
| rs6967953   | 7   | 0.41 | 1.22  | $1.53 \times 10^{-2}$ | 1.39  | $3.05 \times 10^{-5}$ | 0.65  | $8.86 \times 10^{-4}$ | $8.99 \times 10^{-5}$ | <i>CHRM2</i>        | rs6967953  | 1     | 0.41 | 0.93  | 0.43     | 0.85  | 0.06     | 1.28  | 0.08     |
| rs10499761  | 7   | 0.18 | 1.43  | $1.14 \times 10^{-4}$ | 1.47  | $3.64 \times 10^{-5}$ | 0.57  | $4.38 \times 10^{-5}$ | $6.42 \times 10^{-5}$ | <i>LOC105375288</i> | rs10499761 | 1     | 0.18 | 0.98  | 0.84     | 1.05  | 0.62     | 0.99  | 0.93     |
| rs2539668   | 2   | 0.31 | 1.26  | $5.68 \times 10^{-3}$ | 1.40  | $4.91 \times 10^{-5}$ | 0.64  | $8.89 \times 10^{-4}$ | $8.32 \times 10^{-5}$ | NA                  | rs2539668  | 1     | 0.31 | 1.09  | 0.33     | 1.15  | 0.12     | 0.84  | 0.21     |
| rs7046834   | 9   | 0.16 | 0.86  | $1.31 \times 10^{-1}$ | 0.66  | $5.08 \times 10^{-5}$ | 1.75  | $3.13 \times 10^{-4}$ | $5.85 \times 10^{-5}$ | NA                  | rs7046834  | 1     | 0.14 | 0.99  | 0.95     | 0.96  | 0.73     | 1.06  | 0.71     |
| rs12549180  | 8   | 0.19 | 1.32  | $3.34 \times 10^{-3}$ | 1.45  | $5.74 \times 10^{-5}$ | 0.66  | $2.63 \times 10^{-3}$ | $6.66 \times 10^{-5}$ | NA                  | rs12549180 | 1     | 0.19 | 0.97  | 0.77     | 0.86  | 0.13     | 1.04  | 0.80     |
| rs7534535   | 1   | 0.25 | 1.16  | $8.15 \times 10^{-2}$ | 1.40  | $5.88 \times 10^{-5}$ | 0.69  | $4.70 \times 10^{-3}$ | $7.62 \times 10^{-5}$ | <i>ADGRL2</i>       | rs7534535  | 1     | 0.25 | 0.92  | 0.41     | 1.05  | 0.62     | 1.02  | 0.92     |
| rs10988794  | 9   | 0.17 | 1.11  | $2.78 \times 10^{-1}$ | 1.46  | $5.90 \times 10^{-5}$ | 0.71  | $1.99 \times 10^{-2}$ | $6.21 \times 10^{-5}$ | NA                  | rs10988794 | 1     | 0.17 | 1.01  | 0.89     | 1.03  | 0.78     | 0.89  | 0.44     |
| rs11075447  | 16  | 0.43 | 0.81  | $9.43 \times 10^{-3}$ | 1.00  | $5.94 \times 10^{-5}$ | 1.57  | $5.05 \times 10^{-4}$ | $9.05 \times 10^{-5}$ | <i>CDH8</i>         | rs11075447 | 1     | 0.43 | 1.03  | 0.78     | 0.95  | 0.56     | 1.02  | 0.92     |
| rs7719969   | 5   | 0.36 | 0.84  | $2.44 \times 10^{-2}$ | 0.72  | $6.14 \times 10^{-5}$ | 1.39  | $1.11 \times 10^{-2}$ | $8.71 \times 10^{-5}$ | <i>ADAMTS12</i>     | rs7719969  | 1     | 0.35 | 1.04  | 0.69     | 1.06  | 0.50     | 0.97  | 0.81     |
| rs10840106  | 11  | 0.39 | 1.24  | $7.34 \times 10^{-3}$ | 1.37  | $7.13 \times 10^{-5}$ | 0.64  | $4.55 \times 10^{-4}$ | $8.88 \times 10^{-5}$ | <i>RPL27A</i>       | rs10840106 | 1     | 0.39 | 0.89  | 0.18     | 0.91  | 0.29     | 1.22  | 0.16     |
| rs6851029   | 4   | 0.26 | 1.33  | $8.65 \times 10^{-4}$ | 1.39  | $7.17 \times 10^{-5}$ | 0.65  | $9.26 \times 10^{-4}$ | $7.82 \times 10^{-5}$ | NA                  | NA         | 0     |      |       |          |       |          |       |          |
| rs7612797   | 3   | 0.48 | 1.14  | $8.36 \times 10^{-2}$ | 1.36  | $7.82 \times 10^{-5}$ | 0.68  | $1.99 \times 10^{-3}$ | $9.13 \times 10^{-5}$ | <i>FHIT</i>         | rs7612797  | 1     | 0.49 | 0.99  | 0.93     | 1.13  | 0.15     | 0.89  | 0.39     |
| rs4733037   | 8   | 0.36 | 1.21  | $1.73 \times 10^{-2}$ | 1.36  | $8.46 \times 10^{-5}$ | 0.68  | $2.38 \times 10^{-3}$ | $8.70 \times 10^{-5}$ | <i>STMN4</i>        | rs4733037  | 1     | 0.34 | 1.03  | 0.78     | 1.02  | 0.85     | 0.97  | 0.84     |
| rs7530962   | 1   | 0.35 | 0.76  | $6.20 \times 10^{-4}$ | 0.73  | $8.48 \times 10^{-5}$ | 1.57  | $3.24 \times 10^{-4}$ | $8.63 \times 10^{-5}$ | NA                  | rs7530962  | 1     | 0.34 | 1.07  | 0.44     | 1.05  | 0.59     | 0.92  | 0.56     |

$R_1$  denotes the relative risk for the offspring having one copy of the variant allele,  $S_1$  denotes the relative risk for the mother having one copy of the variant allele,  $I_M$  denotes the relative risk for a maternal over-transmission of the allele, and  $PV$  denotes p-value.



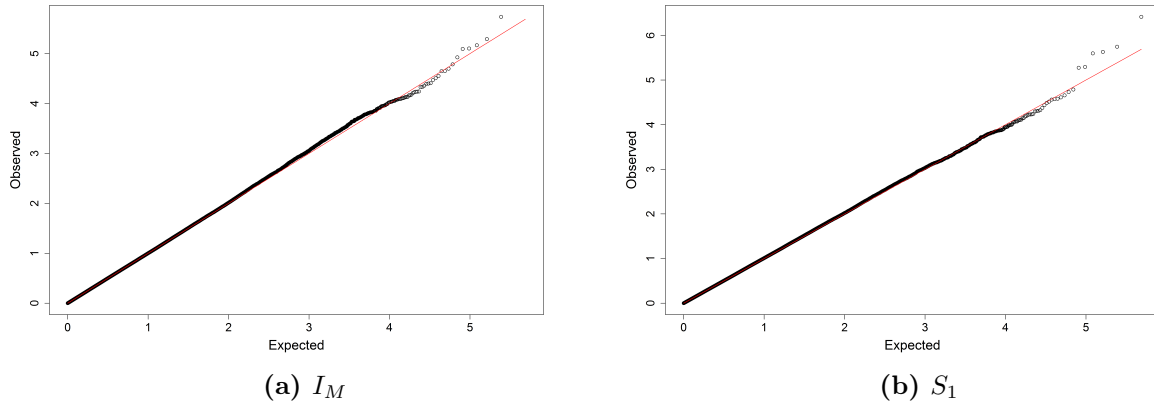

Figure S20: QQ plots for SSC Strict dataset

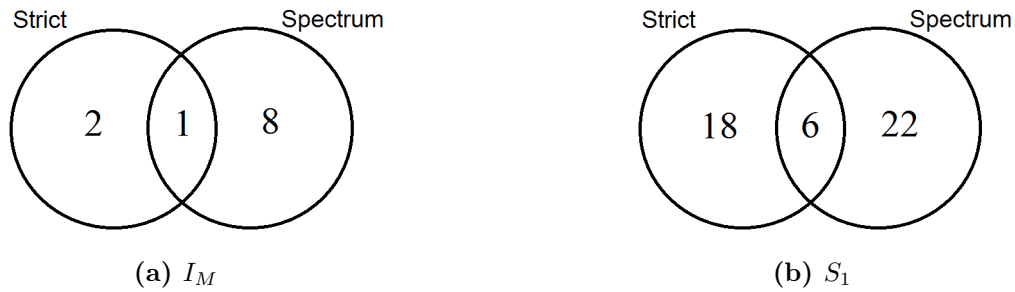

Figure S21: Summary of SSC results for imprinting,  $I_M$ , and maternal genetic effects,  $S_1$ , and the overlap between Strict and Spectrum datasets

## References

- [1] Ainsworth HF, Unwin J, Jamison DL, et al.. Investigation of maternal effects, maternal-fetal interactions and parent-of-origin effects (imprinting), using mothers and their offspring. *Genet Epidemiol.*, 35(1):19–45, 2011.
- [2] Weinberg CR, Wilcox AJ, and Lie RT. A log-linear approach to case-parent-triad data: assessing effects of disease genes that act either directly or through maternal effects and that may be subject to parental imprinting. *Am J Hum Genet*, 62:969–978, 1998.
- [3] Weinberg CR. Methods for detection of parent-of-origin effects in genetic studies of case-parents triads. *Am J Hum Genet*, 65:229–235, 1999.
- [4] Cordell HJ, Barratt BJ, and Clayton DG. Case/pseudocontrol analysis in genetic association studies: a unified framework for detection of genotype and haplotype associations, gene-gene and gene-environment interactions, and parent-of-origin effects. *Genet Epidemiol*, 26:167–85, 2004.
- [5] Connolly Siobhan, and Heron Elizabeth A. Review of statistical methodologies for the detection of parent-of-origin effects in family trio genome-wide association data with binary disease traits. *Briefings in bioinformatics*, pages bbu017–, June 2014.

- [6] Pereira Tiago V, Patsopoulos Nikolaos A, Salanti Georgia, and Ioannidis John P A. Discovery properties of genome-wide association signals from cumulatively combined data sets. *American journal of epidemiology*, 170(10):1197–206, Nov. 2009.
- [7] Purcell S, Neale B, Todd-Brown K, et al.. PLINK: a tool set for whole-genome association and population-based linkage analyses. *Am J Hum Genet*, 81:559–75, 2007.
- [8] R Development Core Team. *R: A Language and Environment for Statistical Computing*. R Foundation for Statistical Computing, Vienna, Austria, 2008. ISBN 3-900051-07-0.
- [9] Price Alkes L, Patterson Nick J, Plenge Robert M, and others. Principal components analysis corrects for stratification in genome-wide association studies. *Nature genetics*, 38(8):904–9, Aug. 2006.
- [10] International HapMap Consortium. The International HapMap Project. *Nature*, 426(6968):789–96, Dec. 2003.
- [11] Wray Naomi R, Goddard Michael E, and Visscher Peter M. Prediction of individual genetic risk to disease from genome-wide association studies. *Genome research*, 17(10):1520–8, Oct. 2007.
- [12] Smith JG, and Newton-Cheh C. *Genome-wide association study in humans*, volume 573. *Methods Mol Biol*, Totowa, NJ, US, 2009.
- [13] Wang Kai, Zhang Haitao, Ma Deqiong, and others. Common genetic variants on 5p14.1 associate with autism spectrum disorders. *Nature*, 459(7246):528–33, May 2009.
- [14] Weiss Lauren A, Arking Dan E, Daly Mark J, and Chakravarti Aravinda. A genome-wide linkage and association scan reveals novel loci for autism. *Nature*, 461(7265):802–8, Oct. 2009.
- [15] Anney R, Klei L, Pinto D, et al.. A genome-wide scan for common alleles affecting risk for autism. *Hum Mol Genet.*, 19:4072–4082, 2010.
- [16] Wakefield Jon. Bayes factors for genome-wide association studies: comparison with P-values. *Genetic epidemiology*, 33(1):79–86, Jan. 2009.
- [17] Sanders Stephan J, Murtha Michael T, Gupta Abha R, and others. De novo mutations revealed by whole-exome sequencing are strongly associated with autism. *Nature*, 485(7397):237–41, May 2012.
- [18] Iossifov Ivan, Ronemus Michael, Levy Dan, and others. De novo gene disruptions in children on the autistic spectrum. *Neuron*, 74(2):285–99, Apr. 2012.
- [19] Schaaf Christian P, and Zoghbi Huda Y. Solving the autism puzzle a few pieces at a time. *Neuron*, 70(5):806–8, June 2011.
- [20] Gaugler Trent, Klei Lambertus, Sanders Stephan J, and others. Most genetic risk for autism resides with common variation. *Nature genetics*, 46(8):881–885, July 2014.
- [21] Wakefield Jon. Commentary: Genome-wide significance thresholds via Bayes factors. *International journal of epidemiology*, 41(1):286–91, Mar. 2012.

- [22] Wolpert C M, Donnelly S L, Cuccaro M L, and others. De novo partial duplication of chromosome 7p in a male with autistic disorder. *American journal of medical genetics*, 105(3):222–5, Apr. 2001.
- [23] Yuan Han, and Dougherty Joseph D. Investigation of maternal genotype effects in autism by genome-wide association. *Autism research : official journal of the International Society for Autism Research*, 7(2):245–53, May 2014.
- [24] Wolf JB, and Wade MJ. What are maternal effects (and what are they not)? *Philos Trans R Soc Lond B Biol Sci*, 10(1098):1107–1115, 2009.
- [25] Allen-Brady Kristina, Cannon Dale, Robison Reid, McMahon William M, and Coon Hilary. A unified theory of autism revisited: linkage evidence points to chromosome X using a high-risk subset of AGRE families. *Autism research : official journal of the International Society for Autism Research*, 3(2):47–52, Apr. 2010.
- [26] Kaminsky Erin B, Kaul Vineith, Paschall Justin, and others. An evidence-based approach to establish the functional and clinical significance of copy number variants in intellectual and developmental disabilities. *Genetics in medicine : official journal of the American College of Medical Genetics*, 13(9):777–84, Sept. 2011.
- [27] Nudel R., Simpson N. H., Baird G., and others. Genome-wide association analyses of child genotype effects and parent-of-origin effects in specific language impairment. *Genes, Brain and Behavior*, 13(4):418–429, 2014.
- [28] Wang Harold Z, Qin Hai-De, Guo Wei, Samuels Jack, and Shugart Yin Yao. New insights into the genetic mechanism of IQ in autism spectrum disorders. *Frontiers in genetics*, 4:195, Jan. 2013.
- [29] Peça João, Feliciano Cátia, Ting Jonathan T, and others. Shank3 mutant mice display autistic-like behaviours and striatal dysfunction. *Nature*, 472(7344):437–42, Apr. 2011.
- [30] Pagnamenta Alistair T, Khan Hameed, Walker Susan, and others. Rare familial 16q21 microdeletions under a linkage peak implicate cadherin 8 (CDH8) in susceptibility to autism and learning disability. *Journal of medical genetics*, 48(1):48–54, Jan. 2011.
